# Supplementary material for: Δ-Keto-acid/hydroxy-lactone isomerization in some lichen depsides, depsidones and diphenyl ethers
Source: Royal Society of Chemistry journal article supplement (doi:10.1039/d3ob02026f), 2024-01-01
Supplement: d3ob02026f1.pdf [file d3ob02026f1.pdf]

## $\Delta$ -keto-acid /hydroxy-lactone isomerization

### in some lichen depsides, depsidones and diphenyl ethers

Philippe Uriac,<sup>\*a</sup> Solenn Ferron,<sup>a</sup> Philippe Jehan,<sup>b</sup> Thierry Roisnel,<sup>a</sup> and Sophie Tomasi<sup>a</sup>

a. Univ Rennes, CNRS, ISCR (Institut des Sciences Chimiques de Rennes) -UMR 6226, Rennes, France.

b. Univ Rennes, CNRS, ScanMAT UAR 2025, CRMPO (Centre Régional de Mesures Physiques de l'Ouest), F-35000 Rennes, France.

#### SUPPORTING INFORMATION

|                                                                                                                                                                                       |    |
|---------------------------------------------------------------------------------------------------------------------------------------------------------------------------------------|----|
| <b>S1.</b> Structure of other lichen specialized metabolites concerned by the study. ....                                                                                             | 2  |
| <b>S2.</b> <sup>1</sup> H NMR data concerning CH <sub>2</sub> -1''' and CH <sub>2</sub> -3''' of <b>hl</b> and <b>ka</b> isomers .....                                                | 4  |
| <b>S3.</b> NMR spectra of <b>2hl</b> (+ <b>2</b> major), <b>3hl</b> (+ <b>3</b> major), <b>5ka</b> , <b>6ka</b> , <b>9</b> , <b>10</b> , <b>11</b> , <b>12</b> , and <b>13'</b> ..... | 6  |
| <b>S4.</b> Complementary <sup>1</sup> H and <sup>2</sup> H NMR for <b>2</b> and <b>6ka</b> .....                                                                                      | 23 |
| <b>S5.</b> NMR spectra of compounds previously reported <sup>1-3</sup> : <b>1</b> , <b>4</b> , <b>5</b> , <b>6</b> , <b>7</b> and of physodic acid and physodone .....                | 27 |
| <b>S6.</b> Example of reaction checking by <sup>1</sup> H NMR and keto-enol study .....                                                                                               | 36 |
| <b>S7.</b> Crystal structure report for $\beta$ -collatone <b>9</b> .....                                                                                                             | 39 |

#### References

- 1 S. Huneck and I. Yoshimura, *Identification of Lichen Substances*, Springer Berlin Heidelberg, Berlin, Heidelberg, 1996.
- 2 S. Ferron, P. Jehan, X. Guillory and P. Uriac, *Phytochemistry*, 2022, **198**, 113139.
- 3 M. Millot, S. Tomasi, S. Sinbandhit and J. Boustie, *Phytochemistry Letters*, 2008, **1**, 139–143.
- 4 M. Millot.; S. Tomasi; K. Articus; Rouaud, I.; A. Bernard; J. Boustie *J. Nat. Prod.* **2007**, *70* (2), 316–318.

**S1.** Structure of other lichen specialized metabolites concerned by the study.

On the left the structure proposed in Hüneck and on the right the corrected structure according to the  $2H-1''$   $^1H$  NMR value and this study.

**Compound with OH-2': hydroxy-lactone isomer**

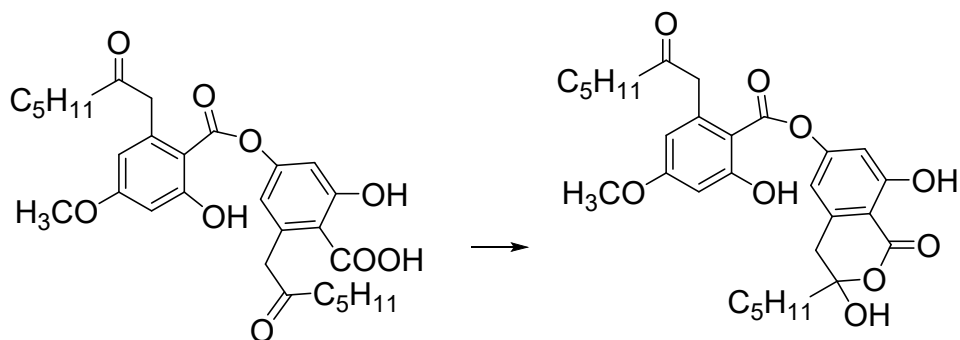

**microphyllinic acid/ no data**

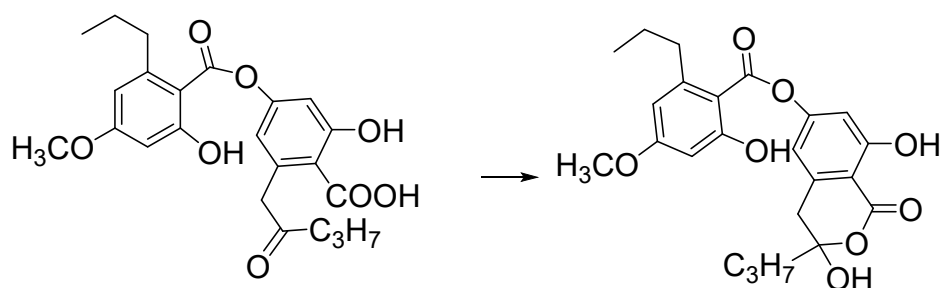

**oxostenosporic acid/ 3.22 ppm**

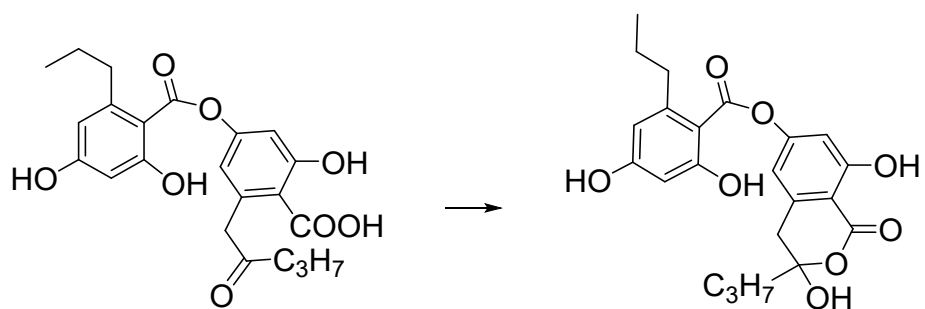

**4-O-demethylglomellic acid/ 3.40 ppm**

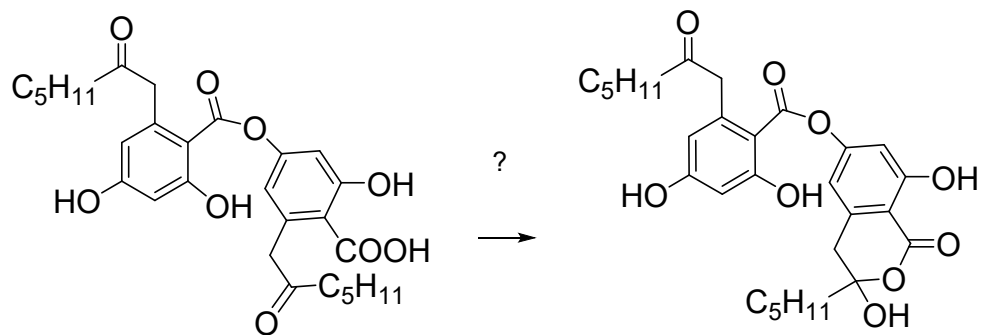

**4-O-demethylmicrophyllinic acid/ 4.05 ppm**

To check

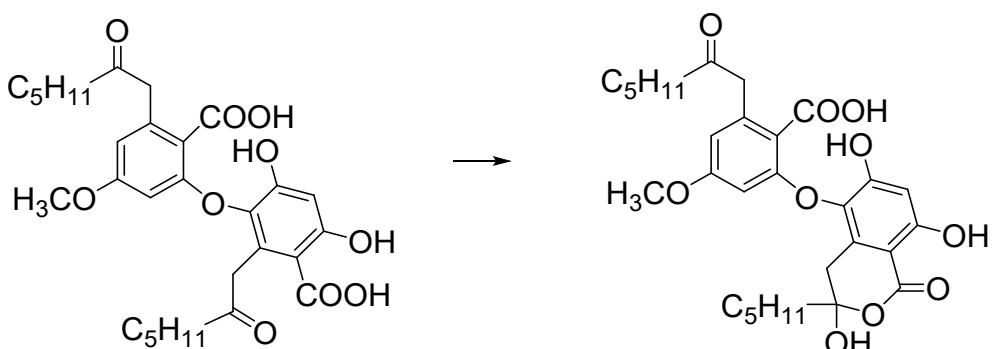

**$\beta$ -alectoronic acid/3.15 ppm**

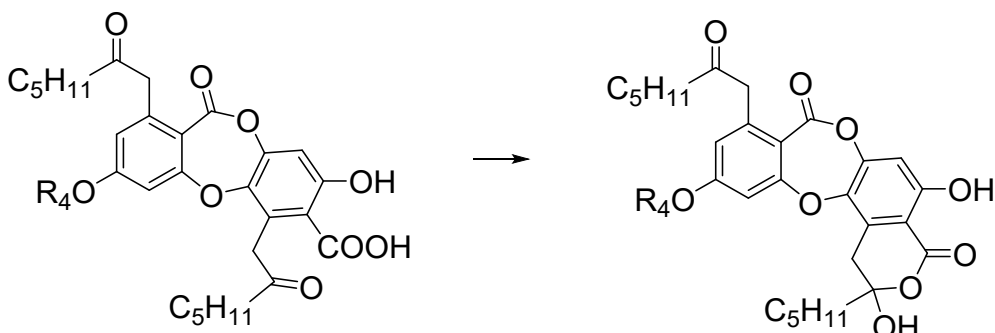

**glomellonic acid/3.52 ppm**

**Compound with OCH<sub>3</sub>-2':  $\delta$ -keto-acid isomer**

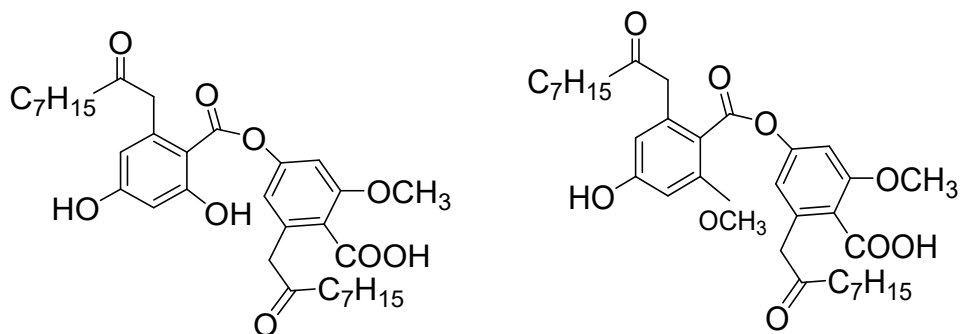

**2'-O-methylsuperphyllinic acid/ no data**

**glaucophaeic acid/ no data**



## $\delta$ -keto-acides ka

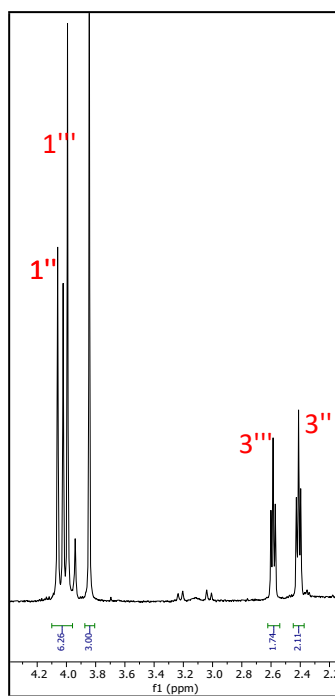

2'-O-methylsuperphyllinic acid **3**

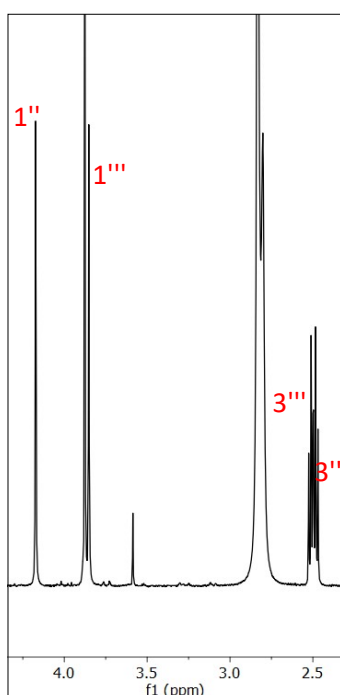

Arthoniaic acid **4**

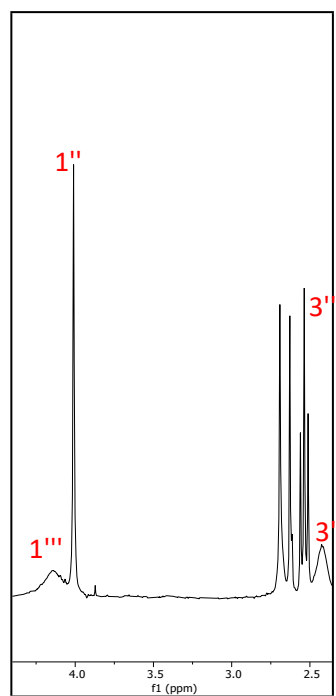

$\alpha$ -isoaleatoronic **6ka**

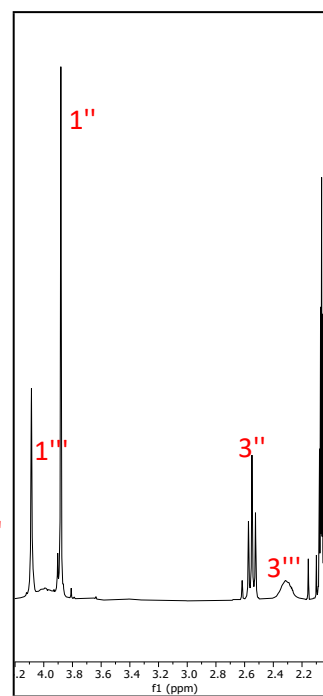

$\alpha$ -isocollatolic **5ka**

S3. NMR spectra of **2hl** (+ **2** major), **3hl** (+ **3** major), **5ka**, **6ka**, **9**, **10**, **11**, **12**, and **13'**

2'-O-methylisomicrophyllinic acid **2hl** ( $\approx 15\%$ )  
 (+ 2'-O-methylmicrophyllinic acid **2**,  $\approx 85\%$ )

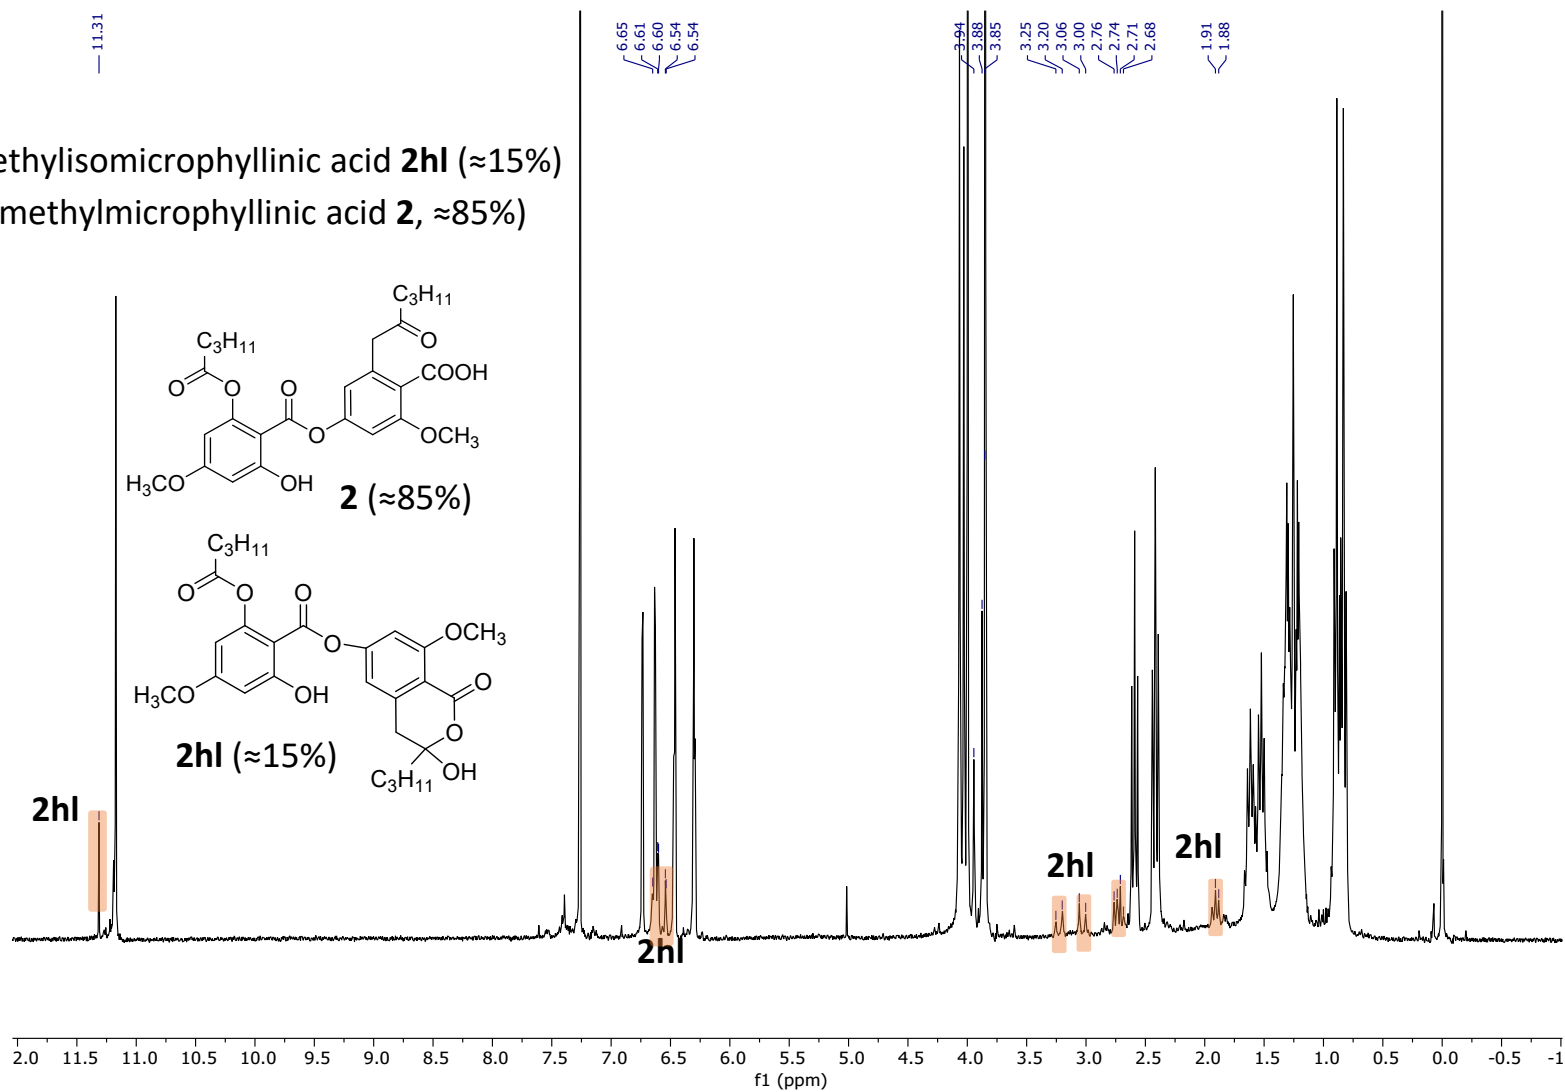

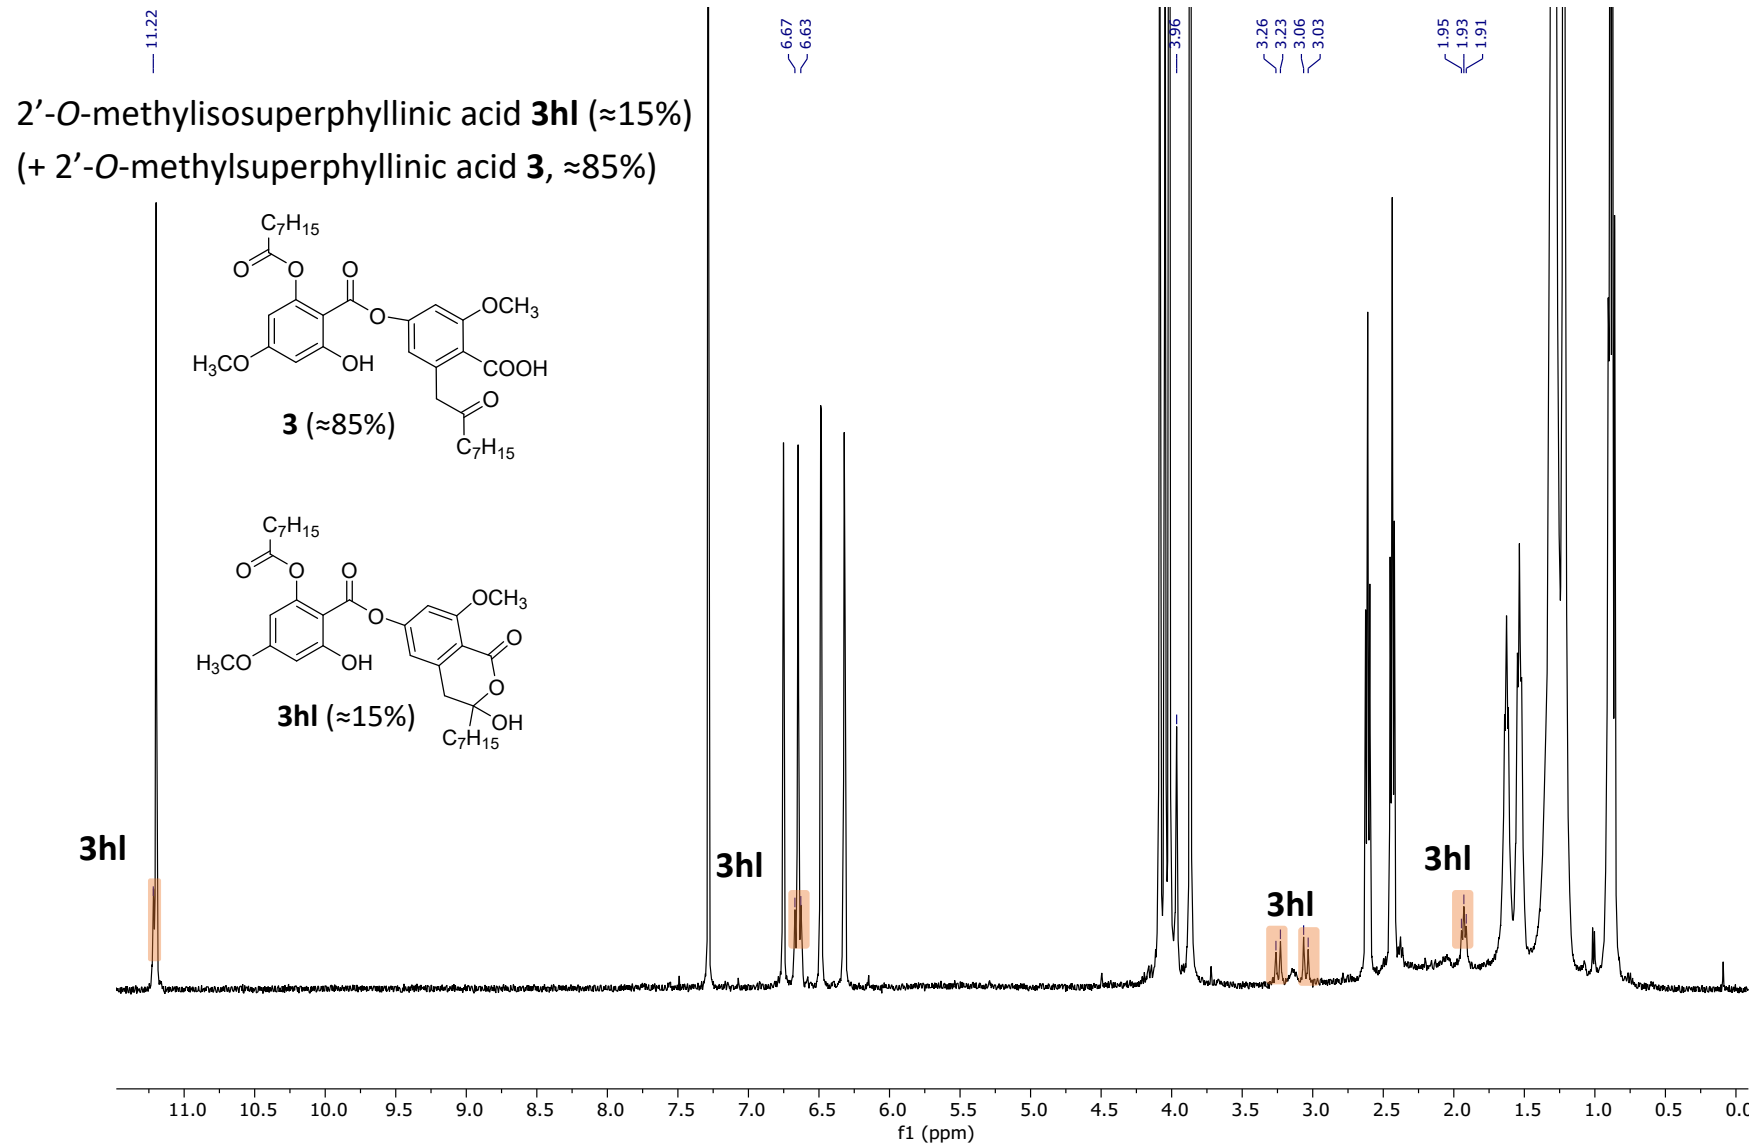

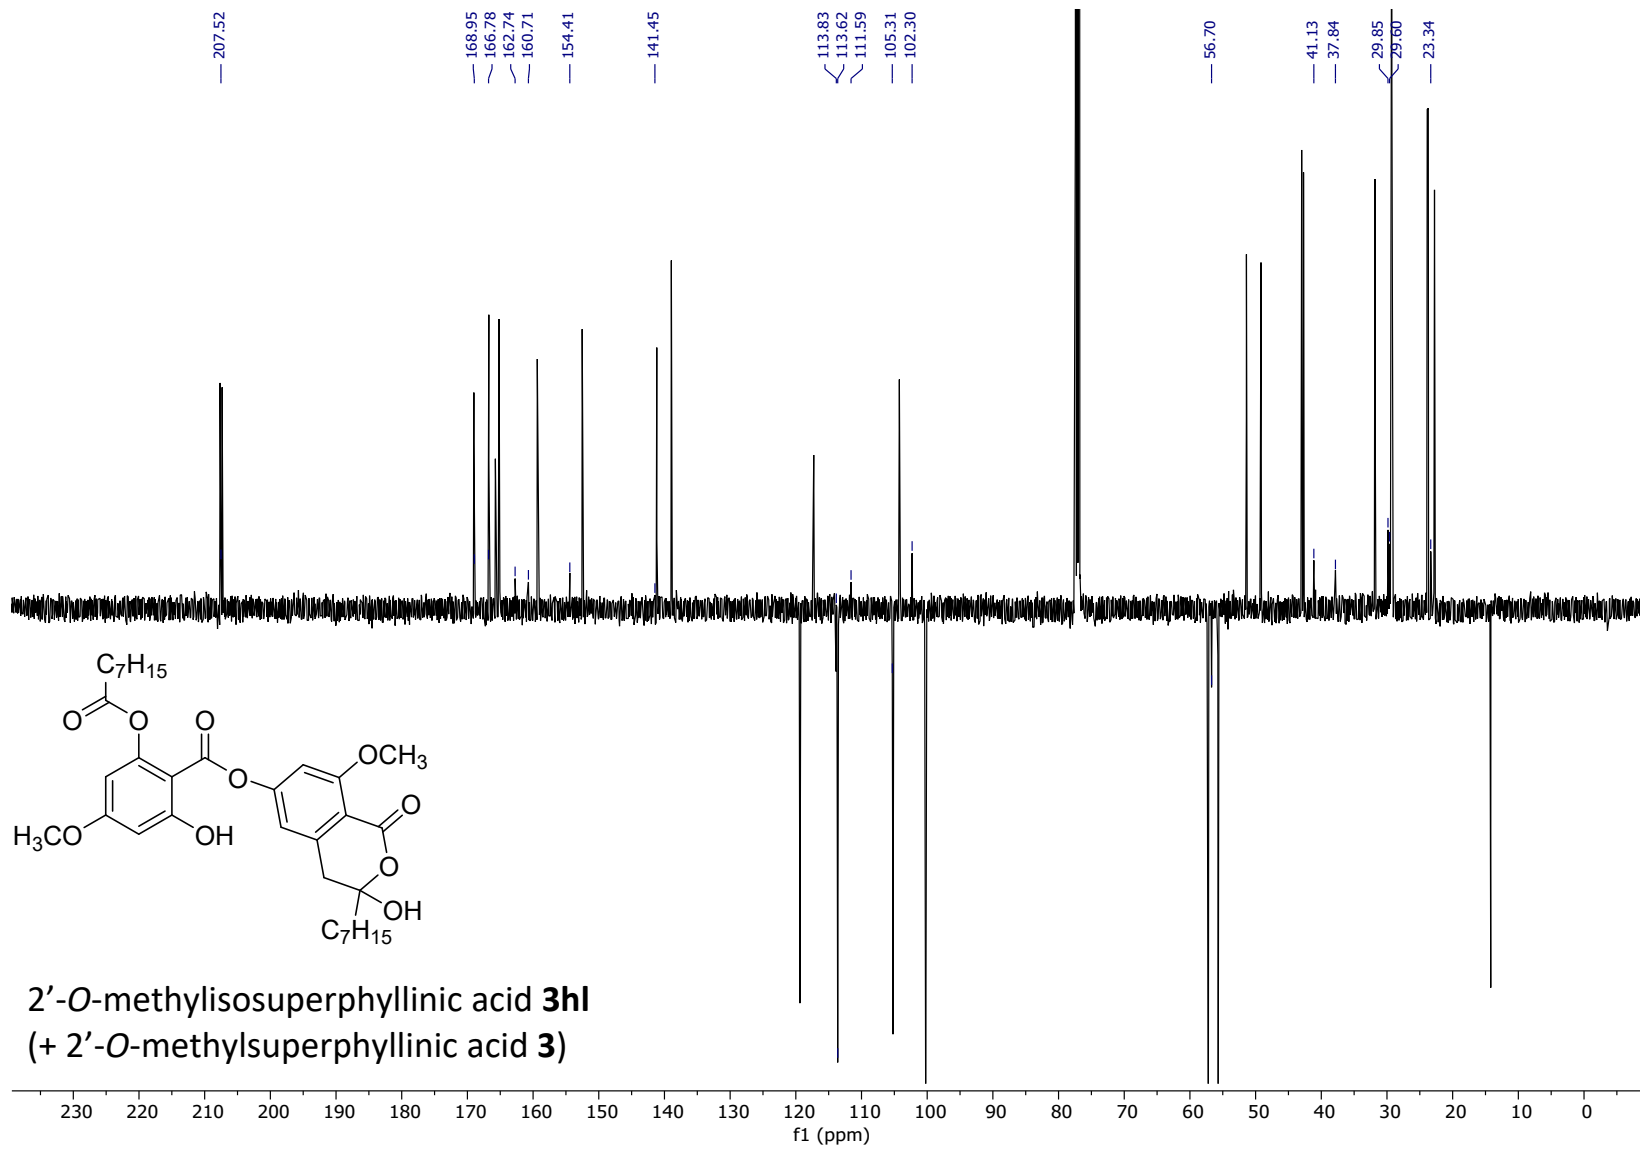



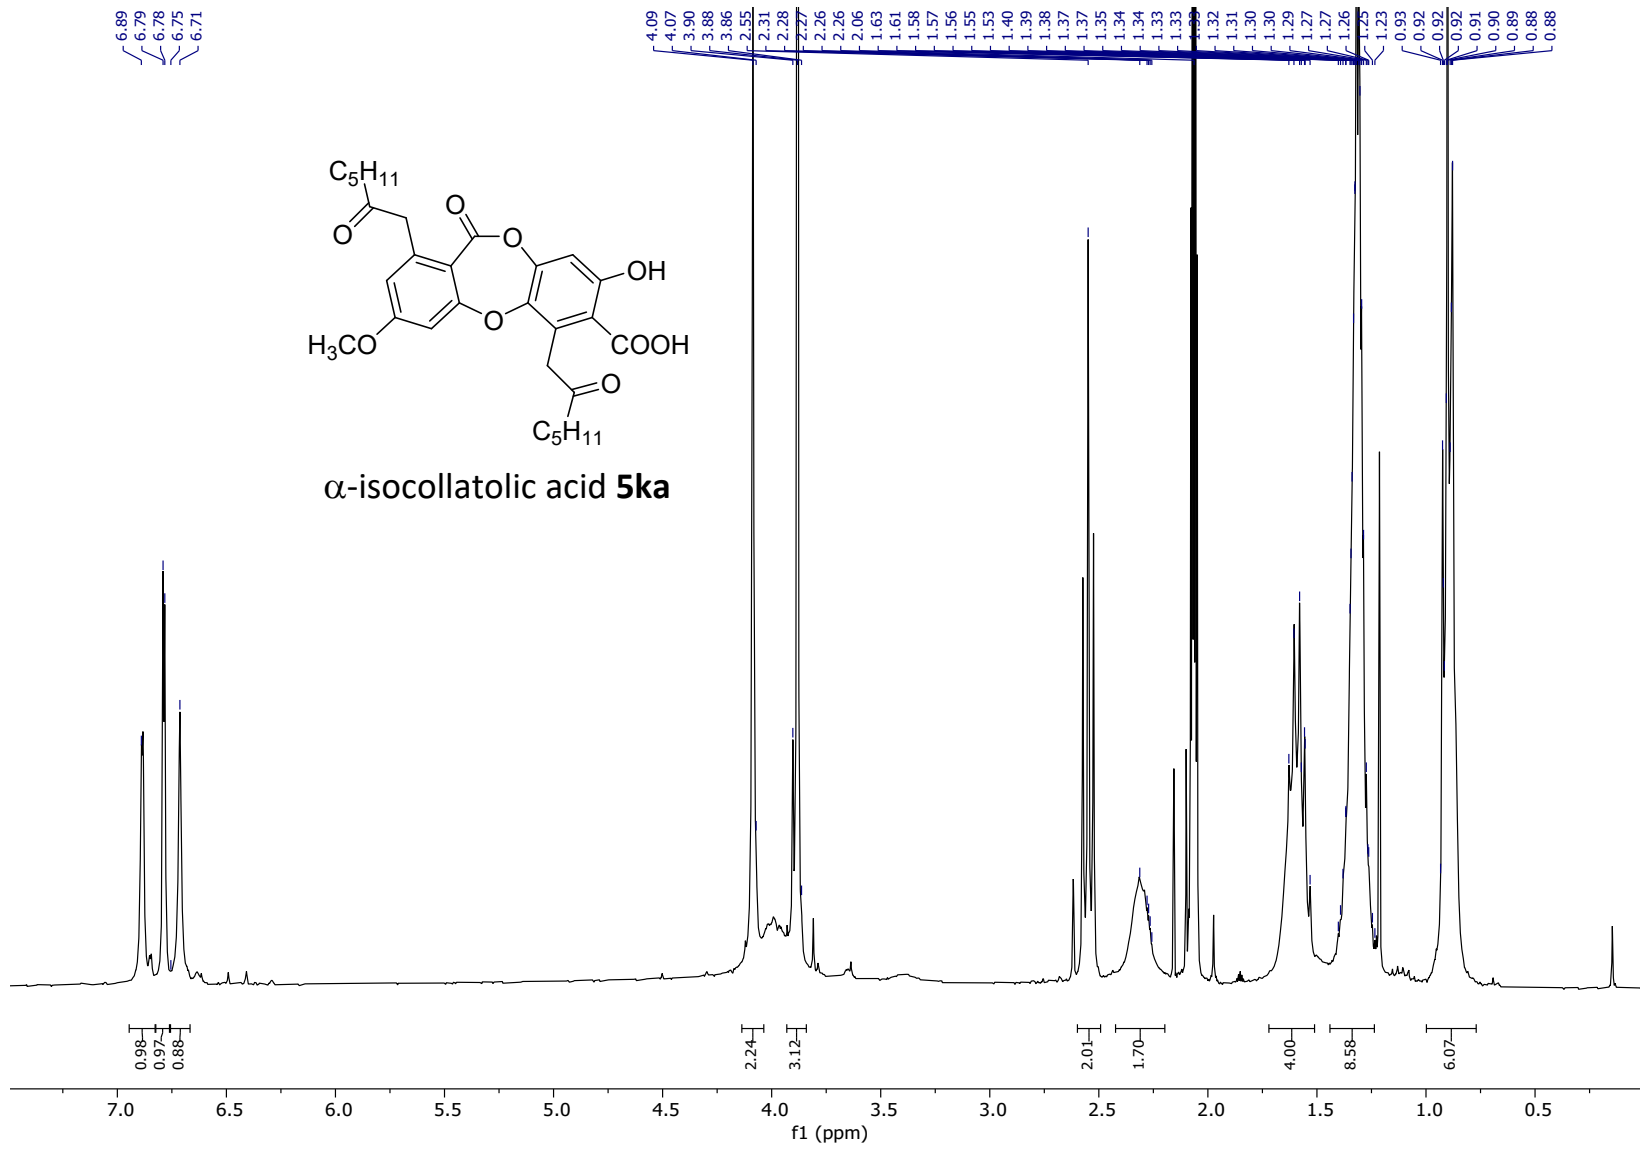

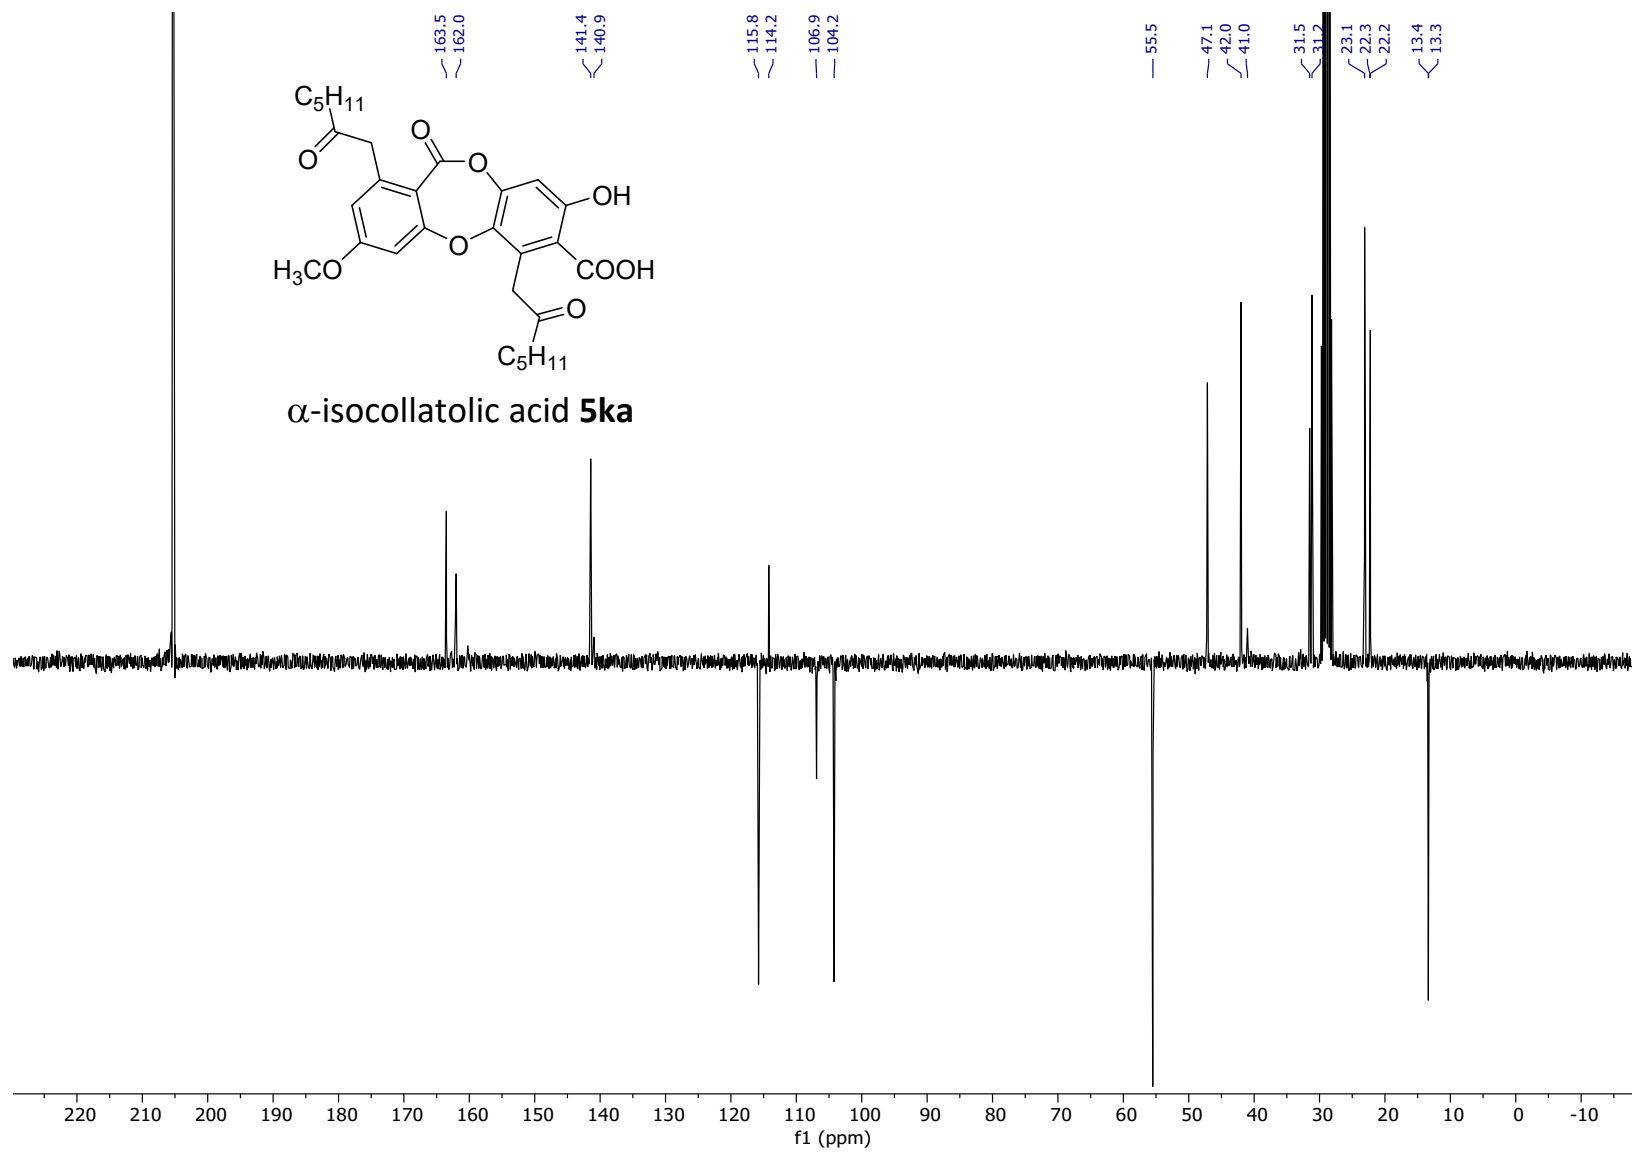

8.16

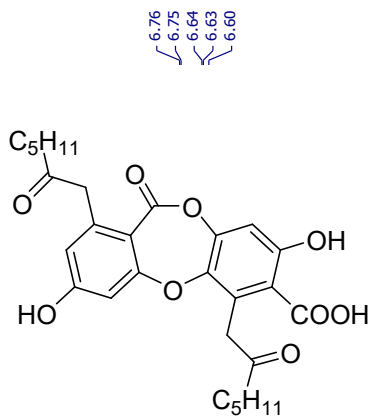

$\alpha$ -isoelectronic acid **6ka**

6.76  
6.75  
6.64  
6.63  
6.60

4.28  
4.27

3.97

2.54  
2.52  
2.49  
2.47  
2.44  
2.41  
2.06  
2.05  
2.04  
2.03  
1.58  
1.55  
1.30  
1.29  
1.28  
1.27  
1.25  
1.24  
1.23  
1.00  
0.88  
0.86  
0.87

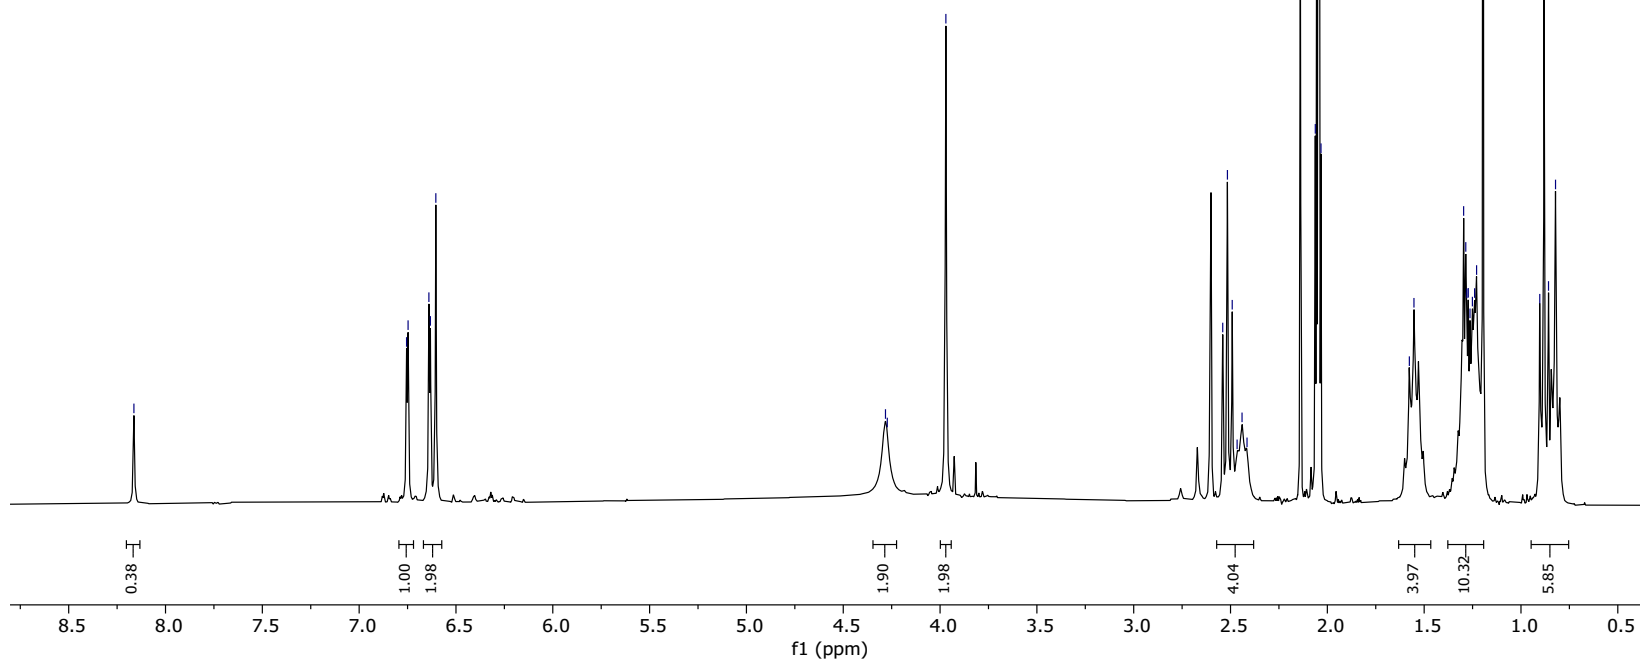

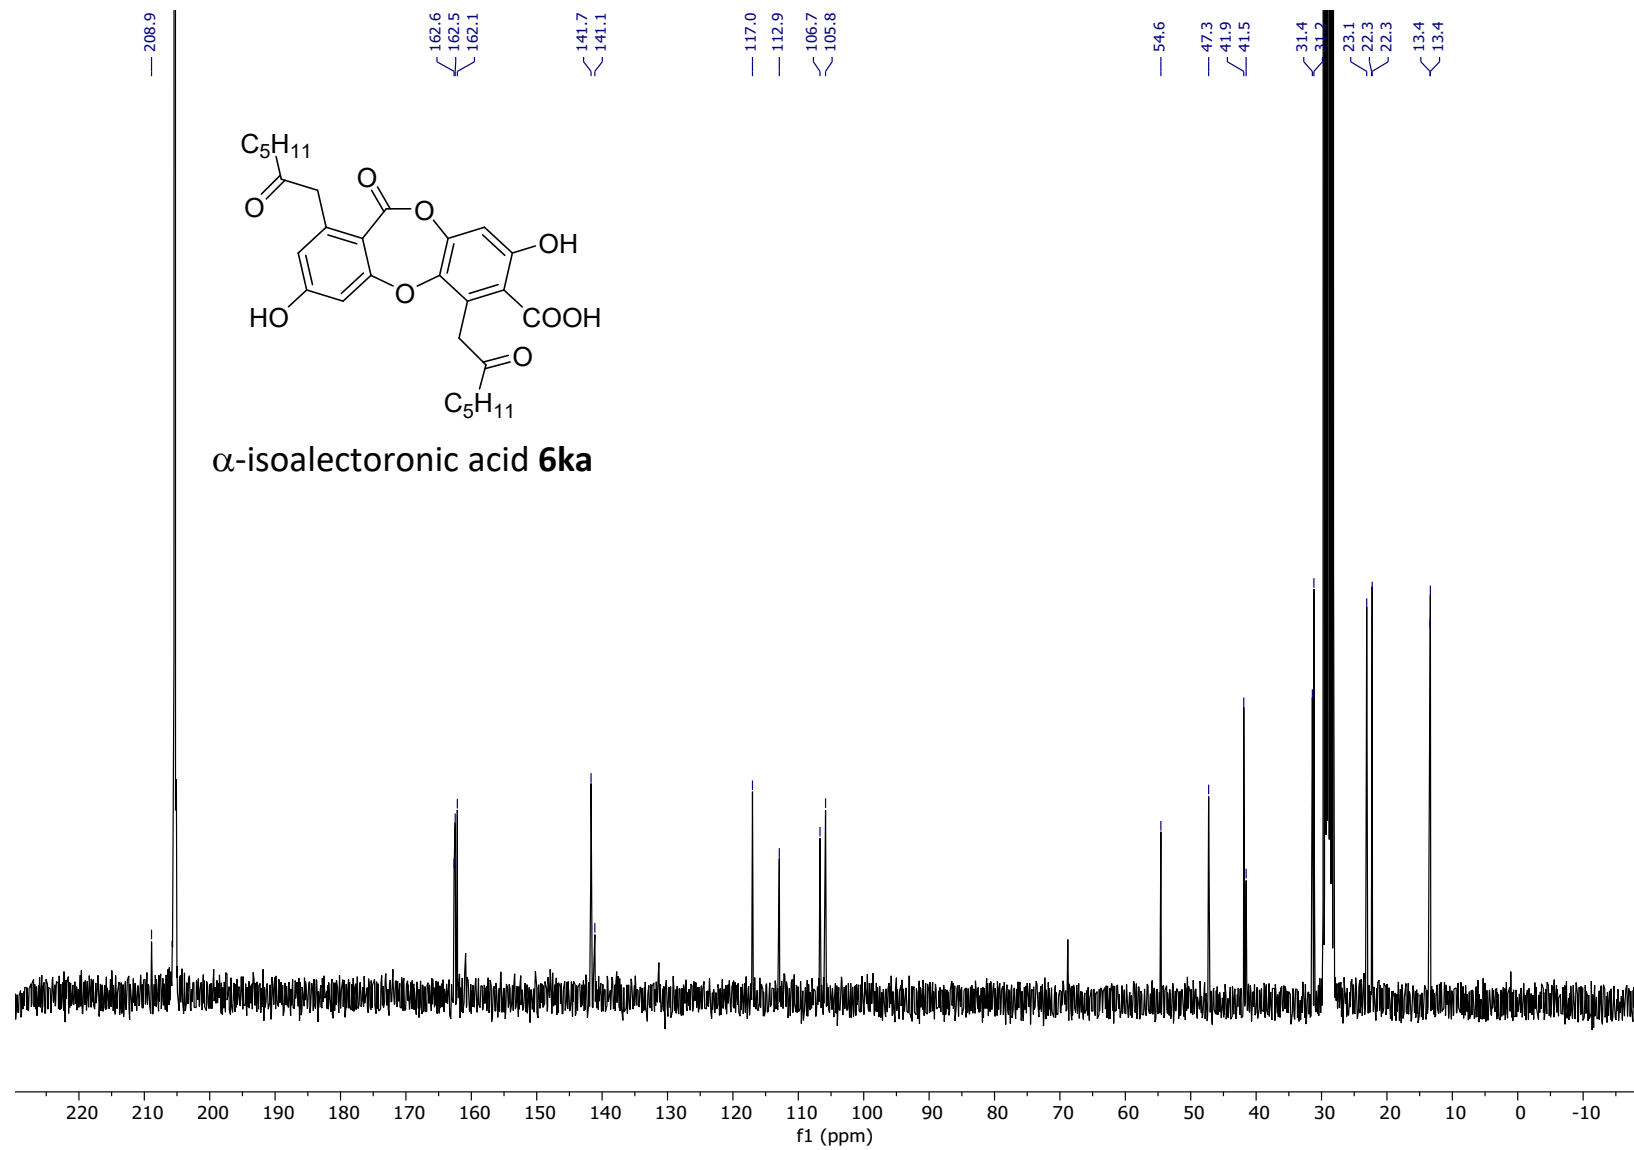

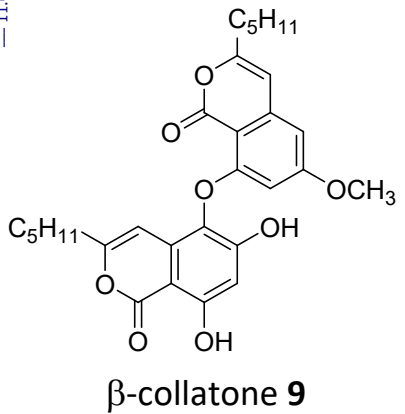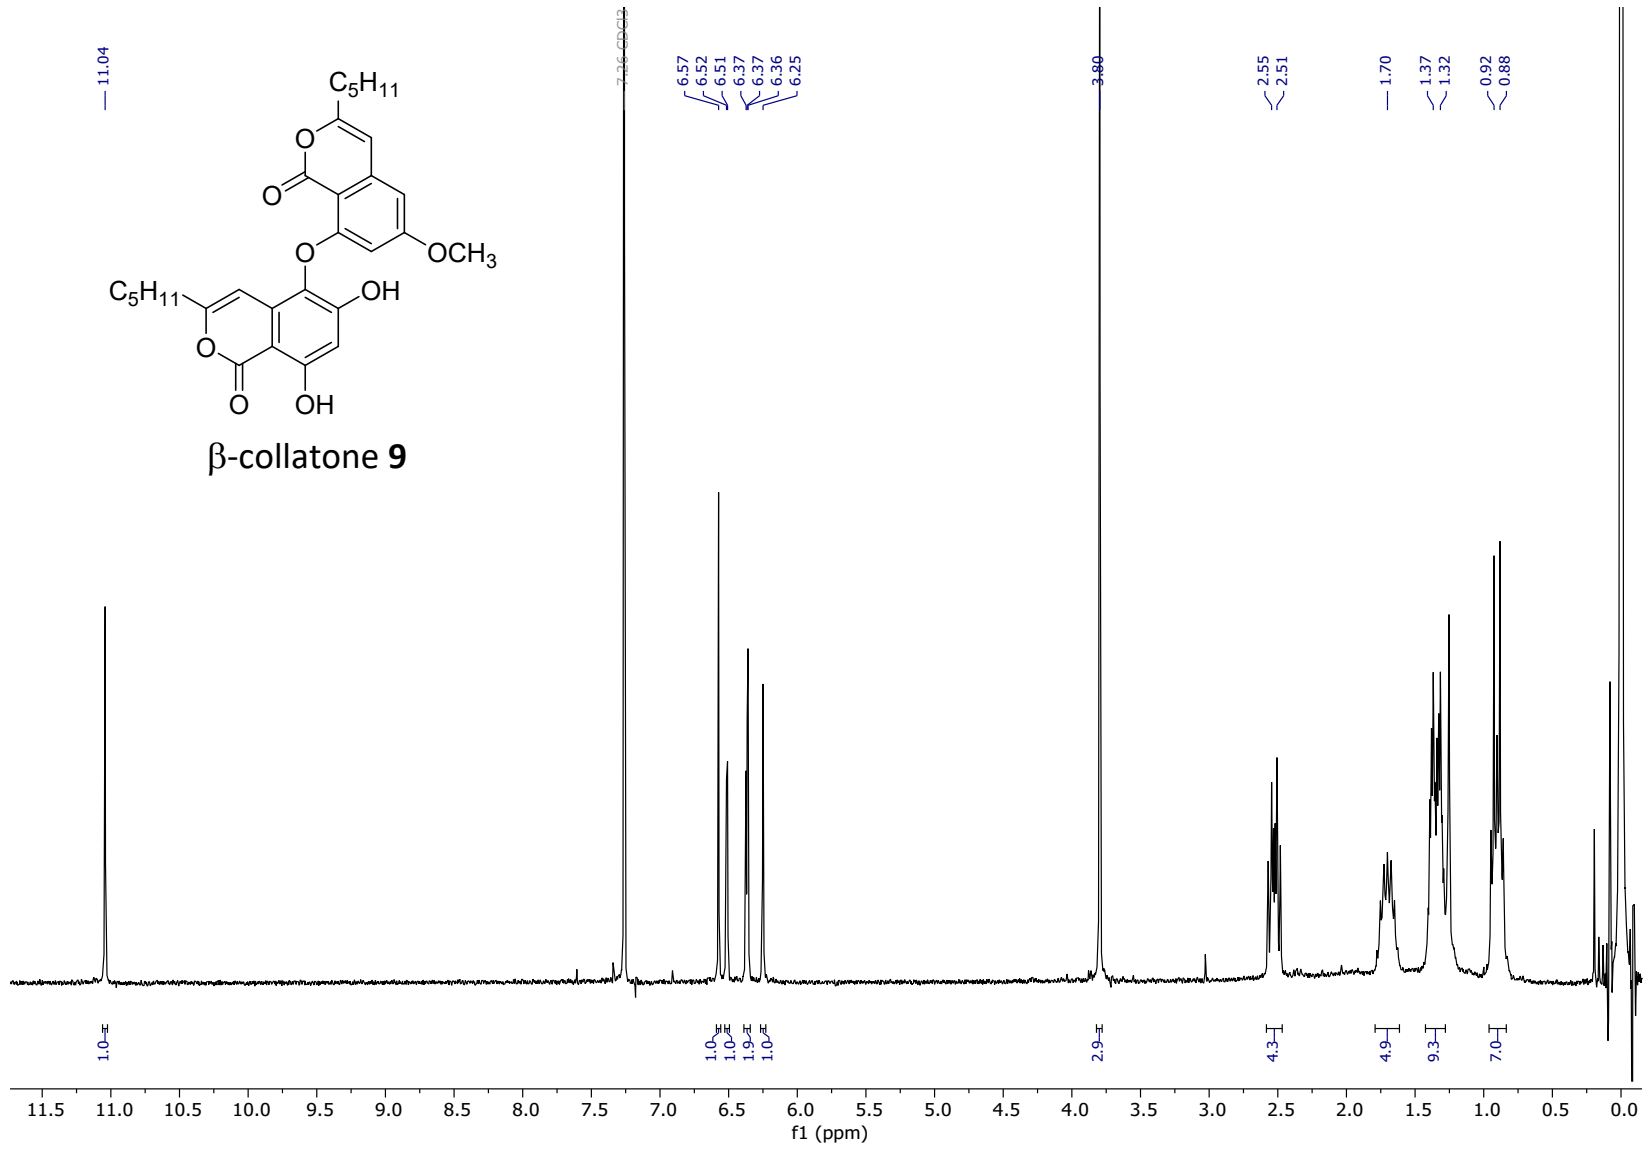

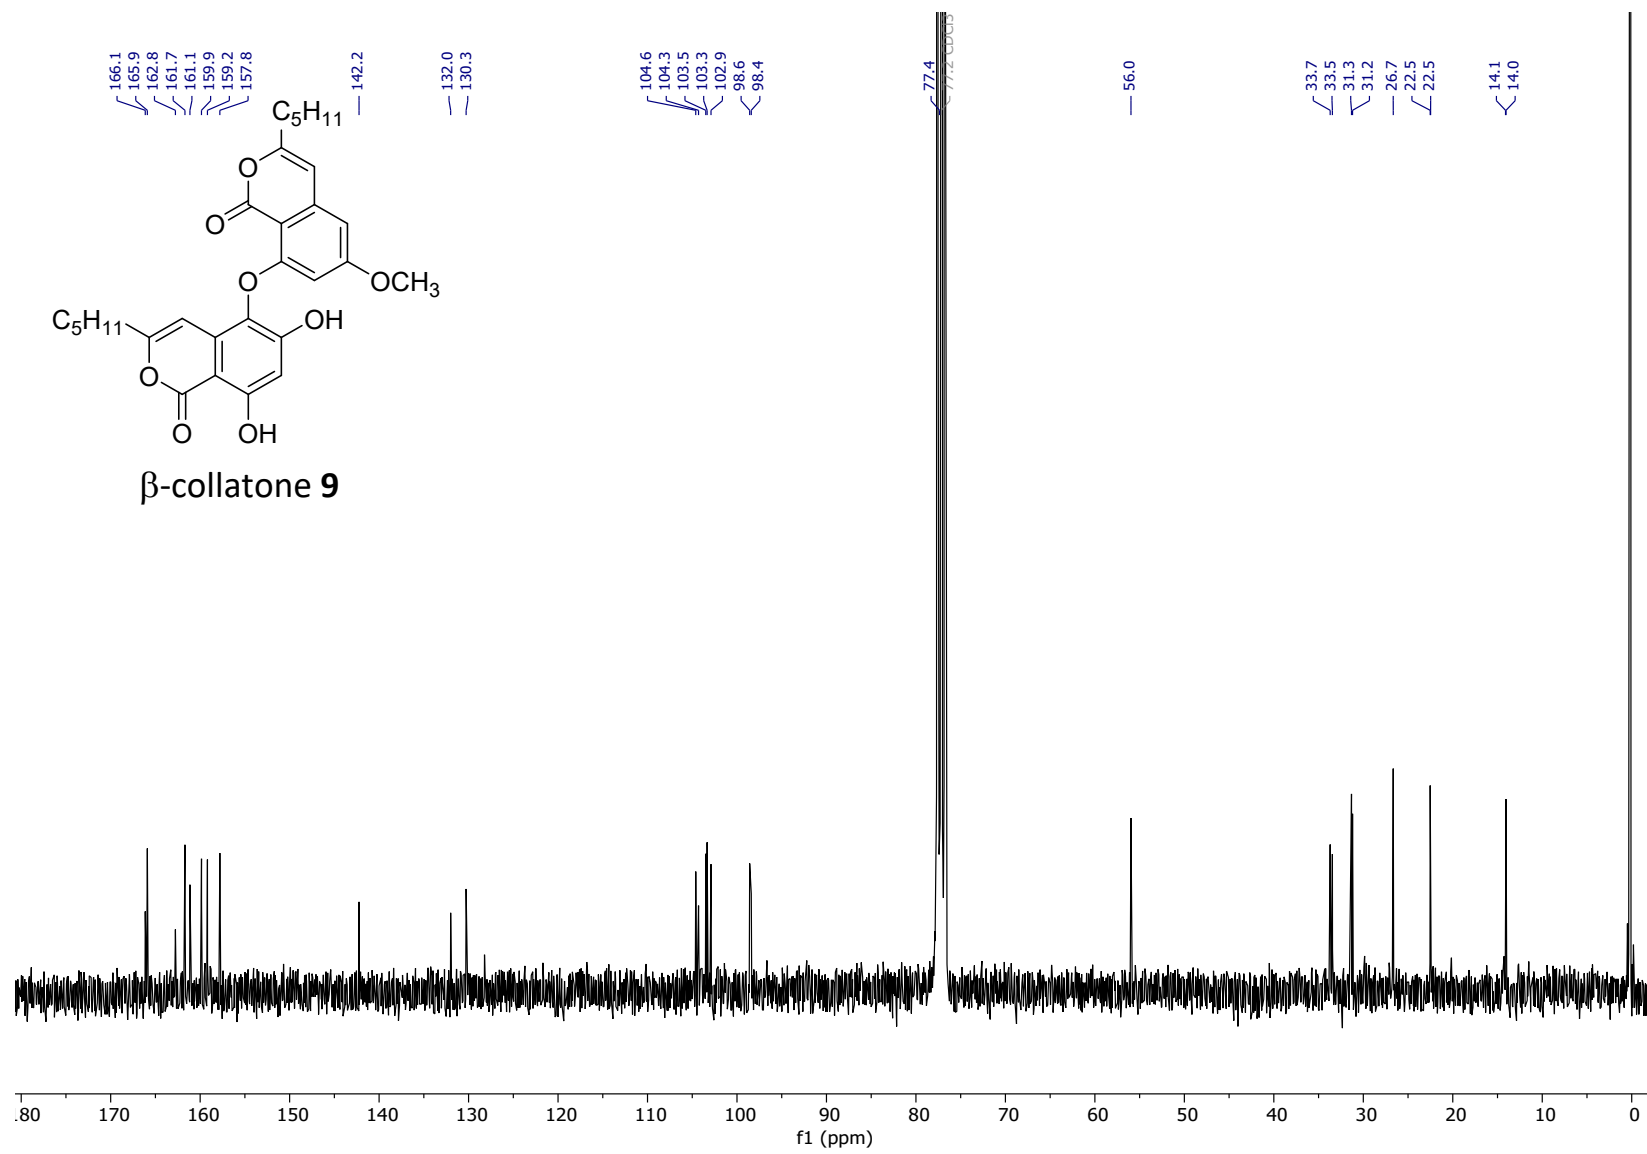

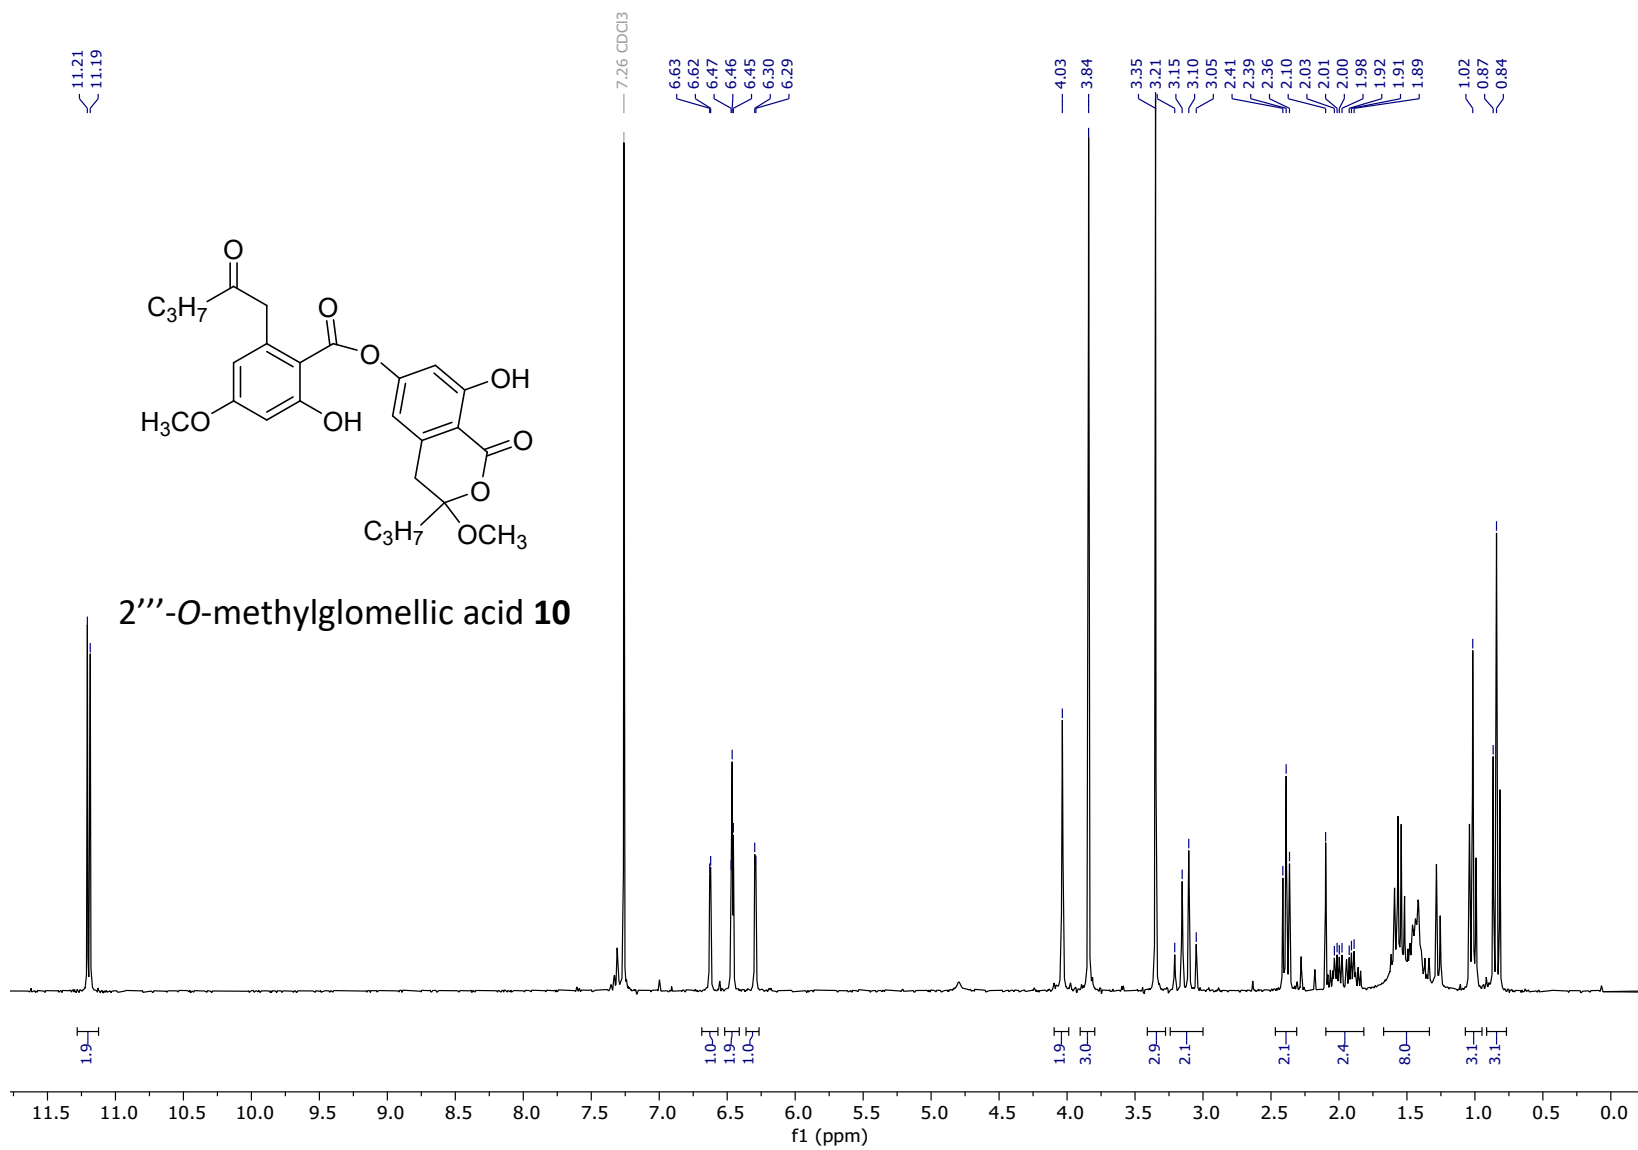

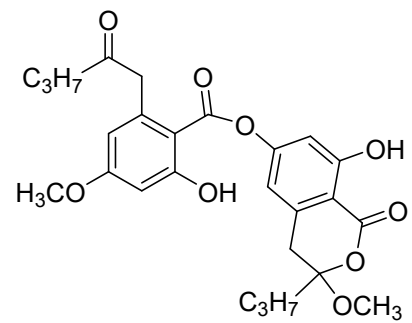

2'''-O-methylglomelic acid **10**

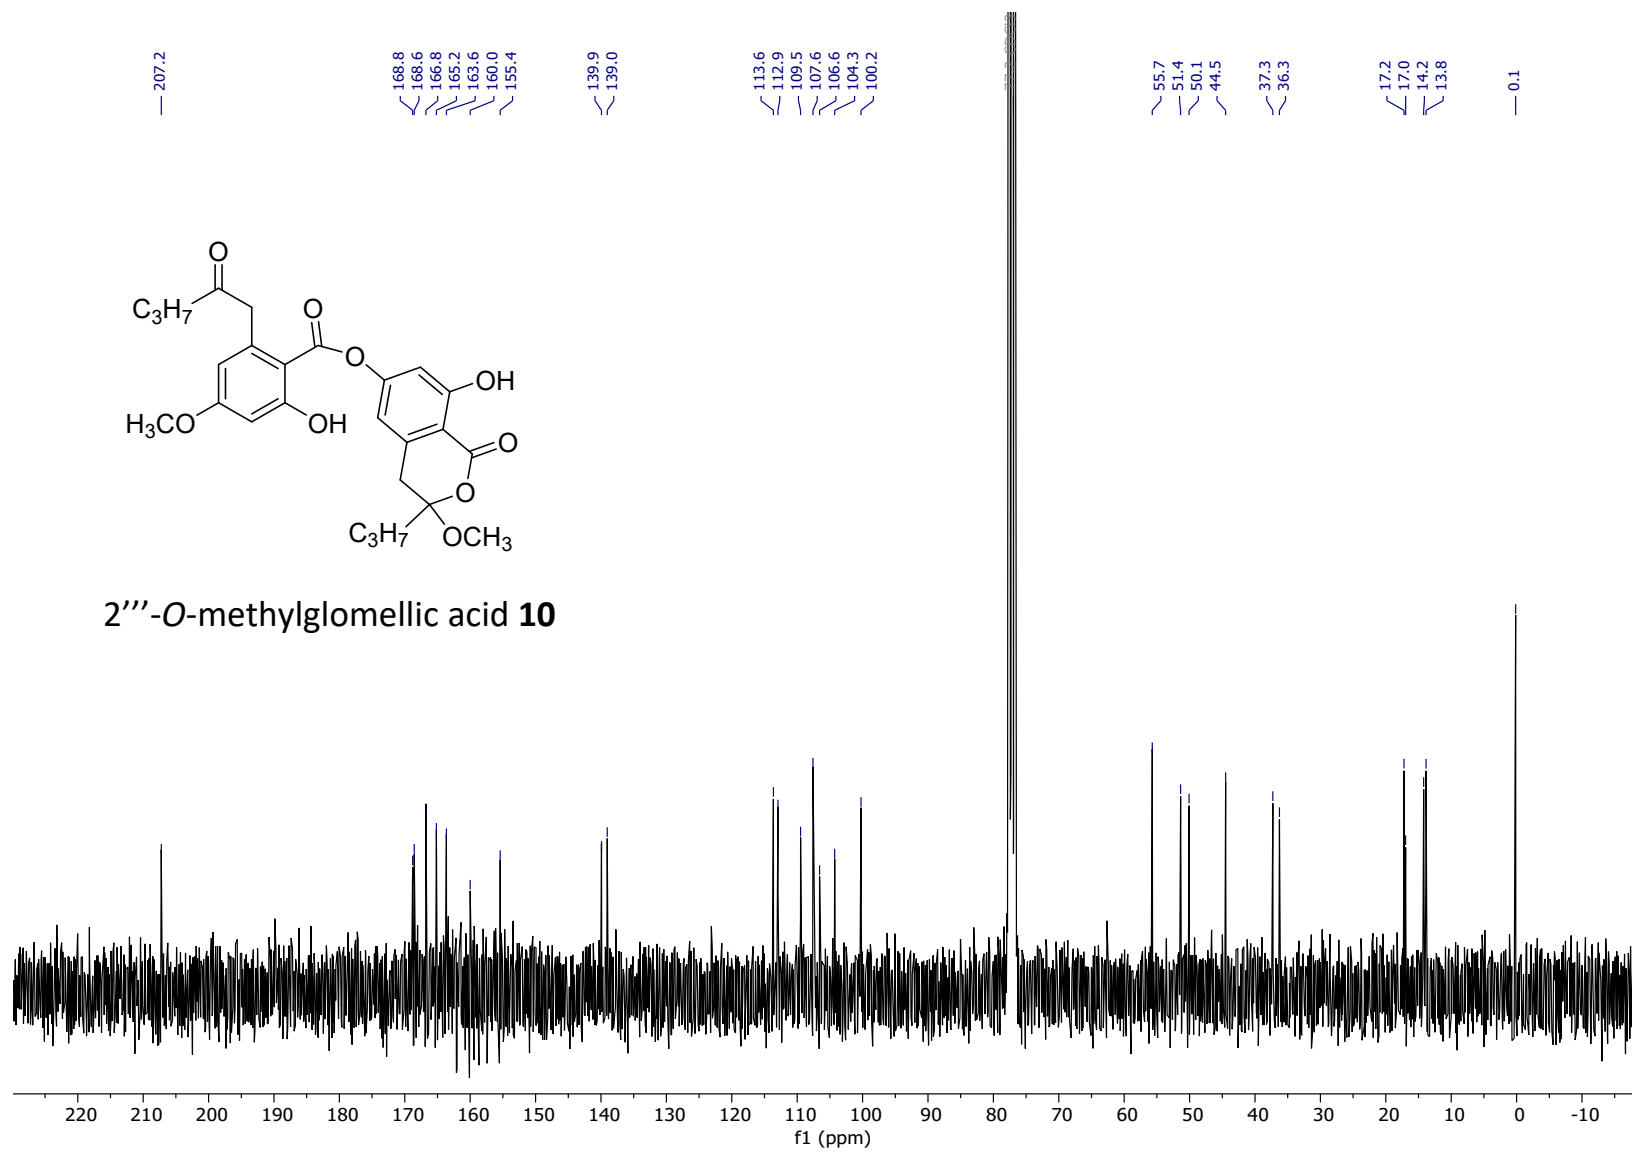



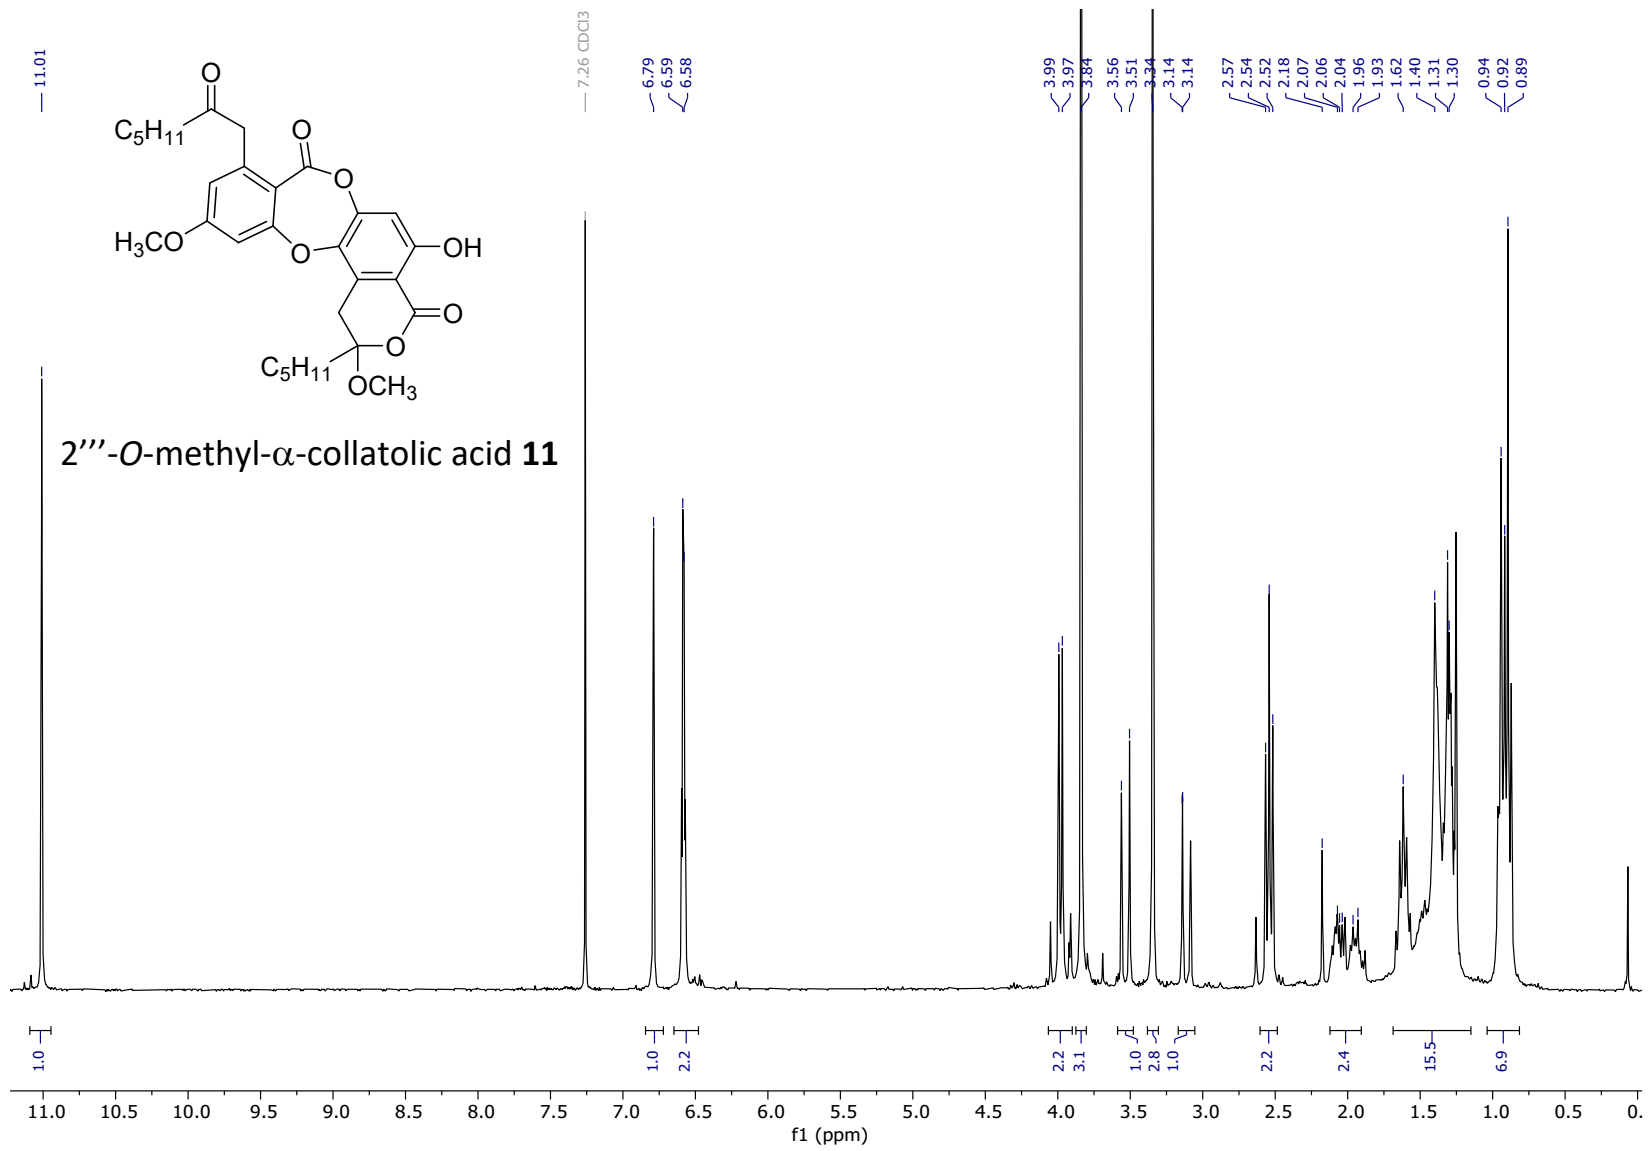

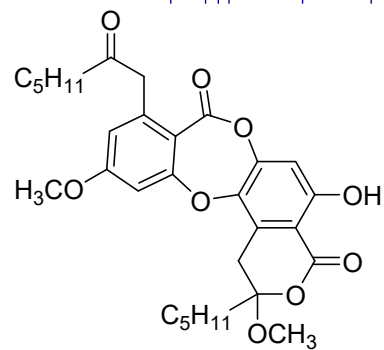

2'''-O-methyl- $\alpha$ -collatolic acid **11**

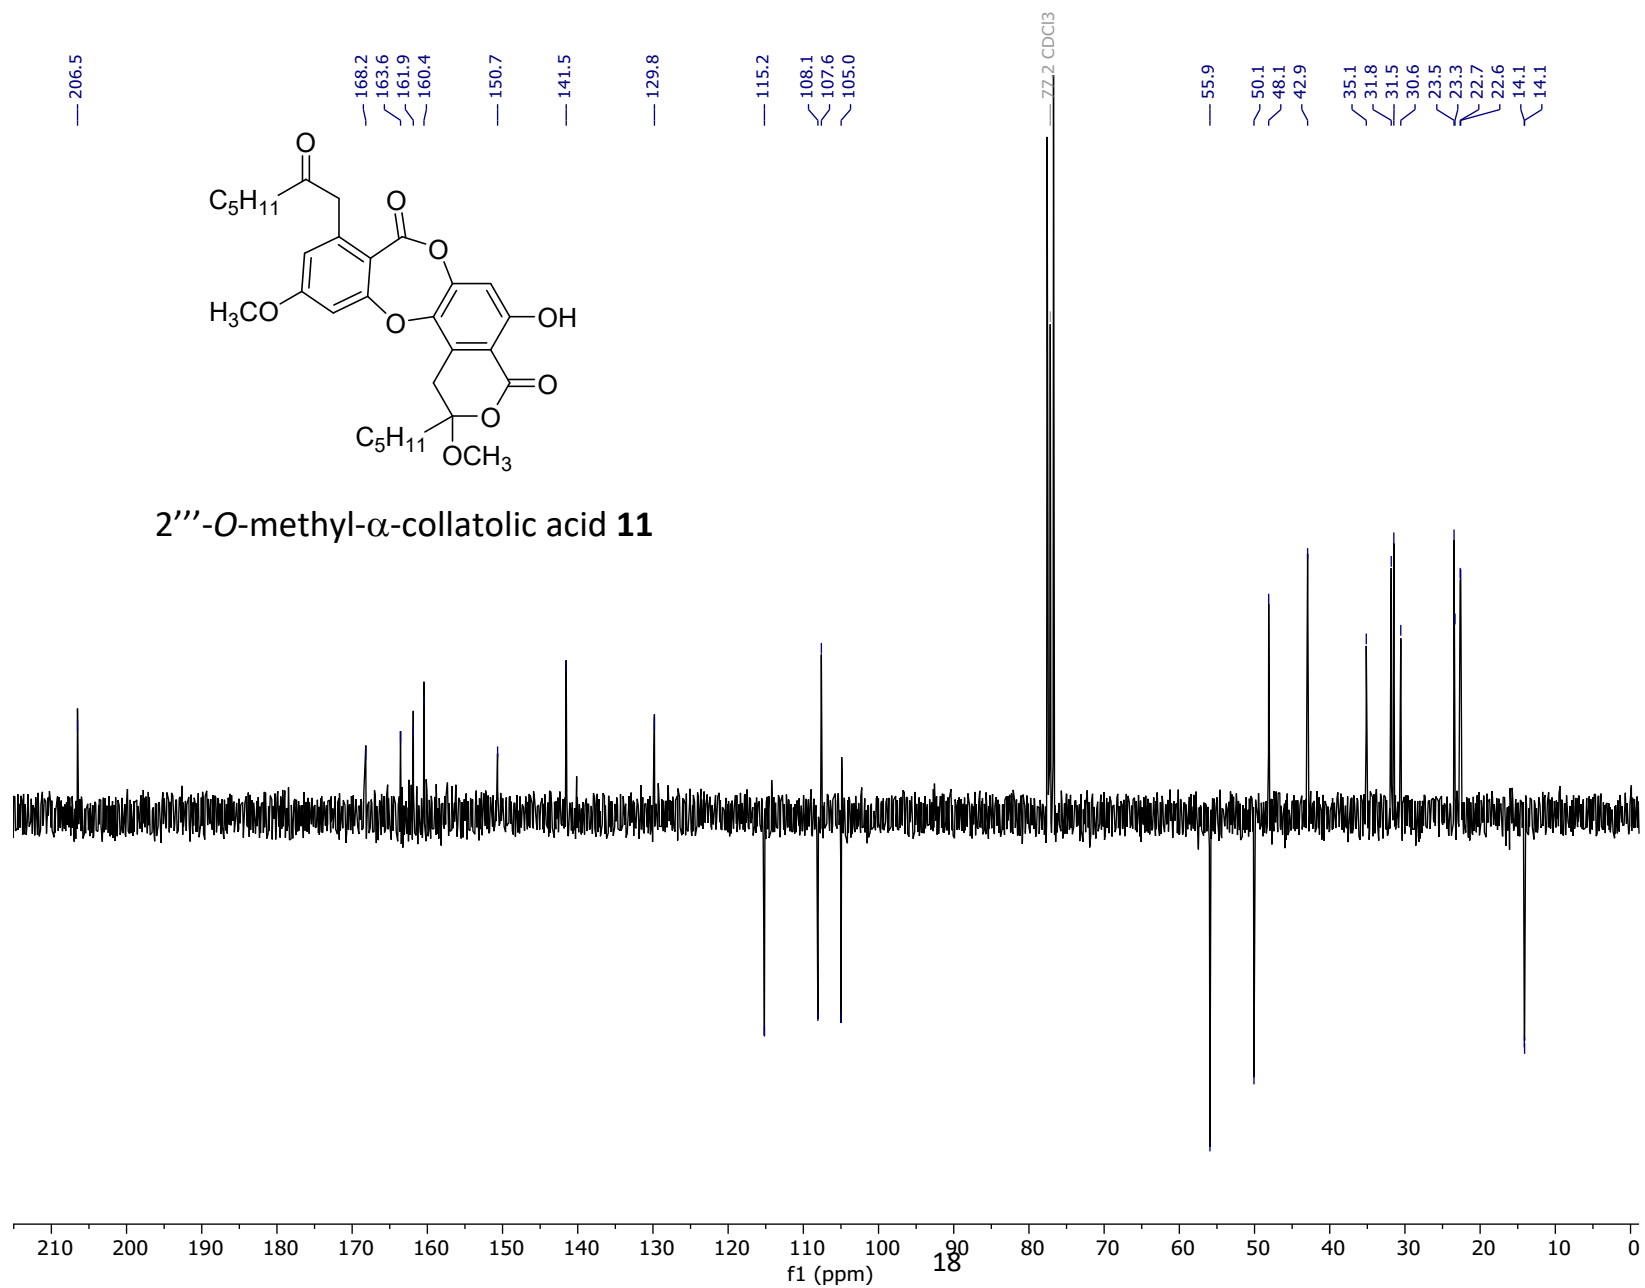

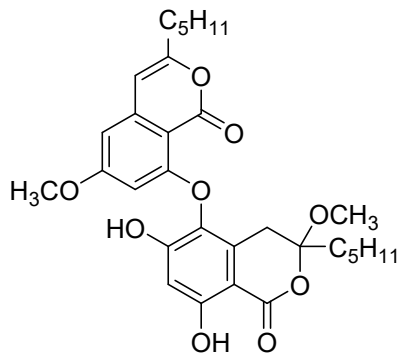

2'''-O-methyl- $\beta$ -collatolic acid **12**

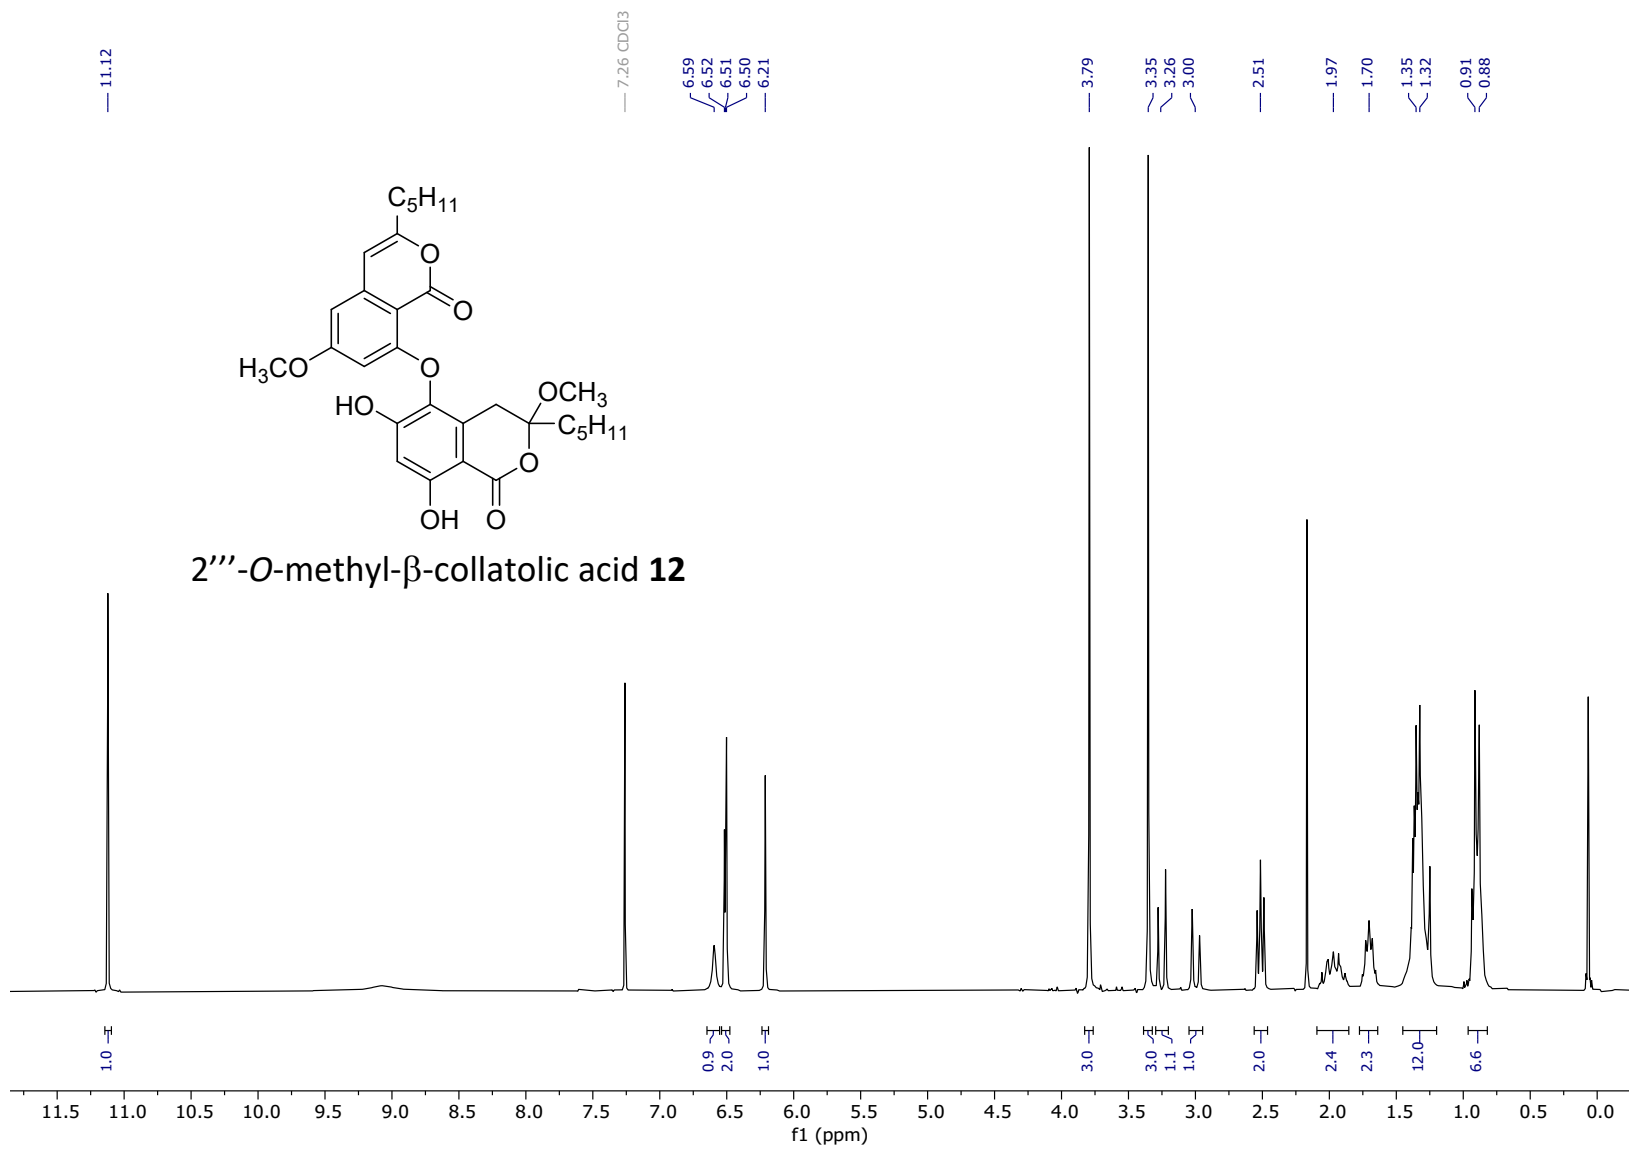

168.4  
166.1  
162.8  
162.3  
160.8  
159.6  
157.1

141.8

134.5

131.3

107.1  
104.3  
104.0  
103.5  
103.3  
103.0  
100.0

56.0

49.9

35.1

33.4

31.8

31.7

31.3

26.6

23.3

22.6

22.5

14.1

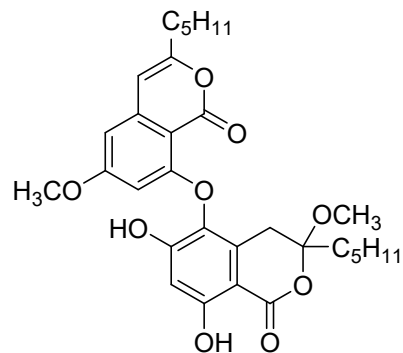

2''-O-methyl-β-collatolic acid **12**

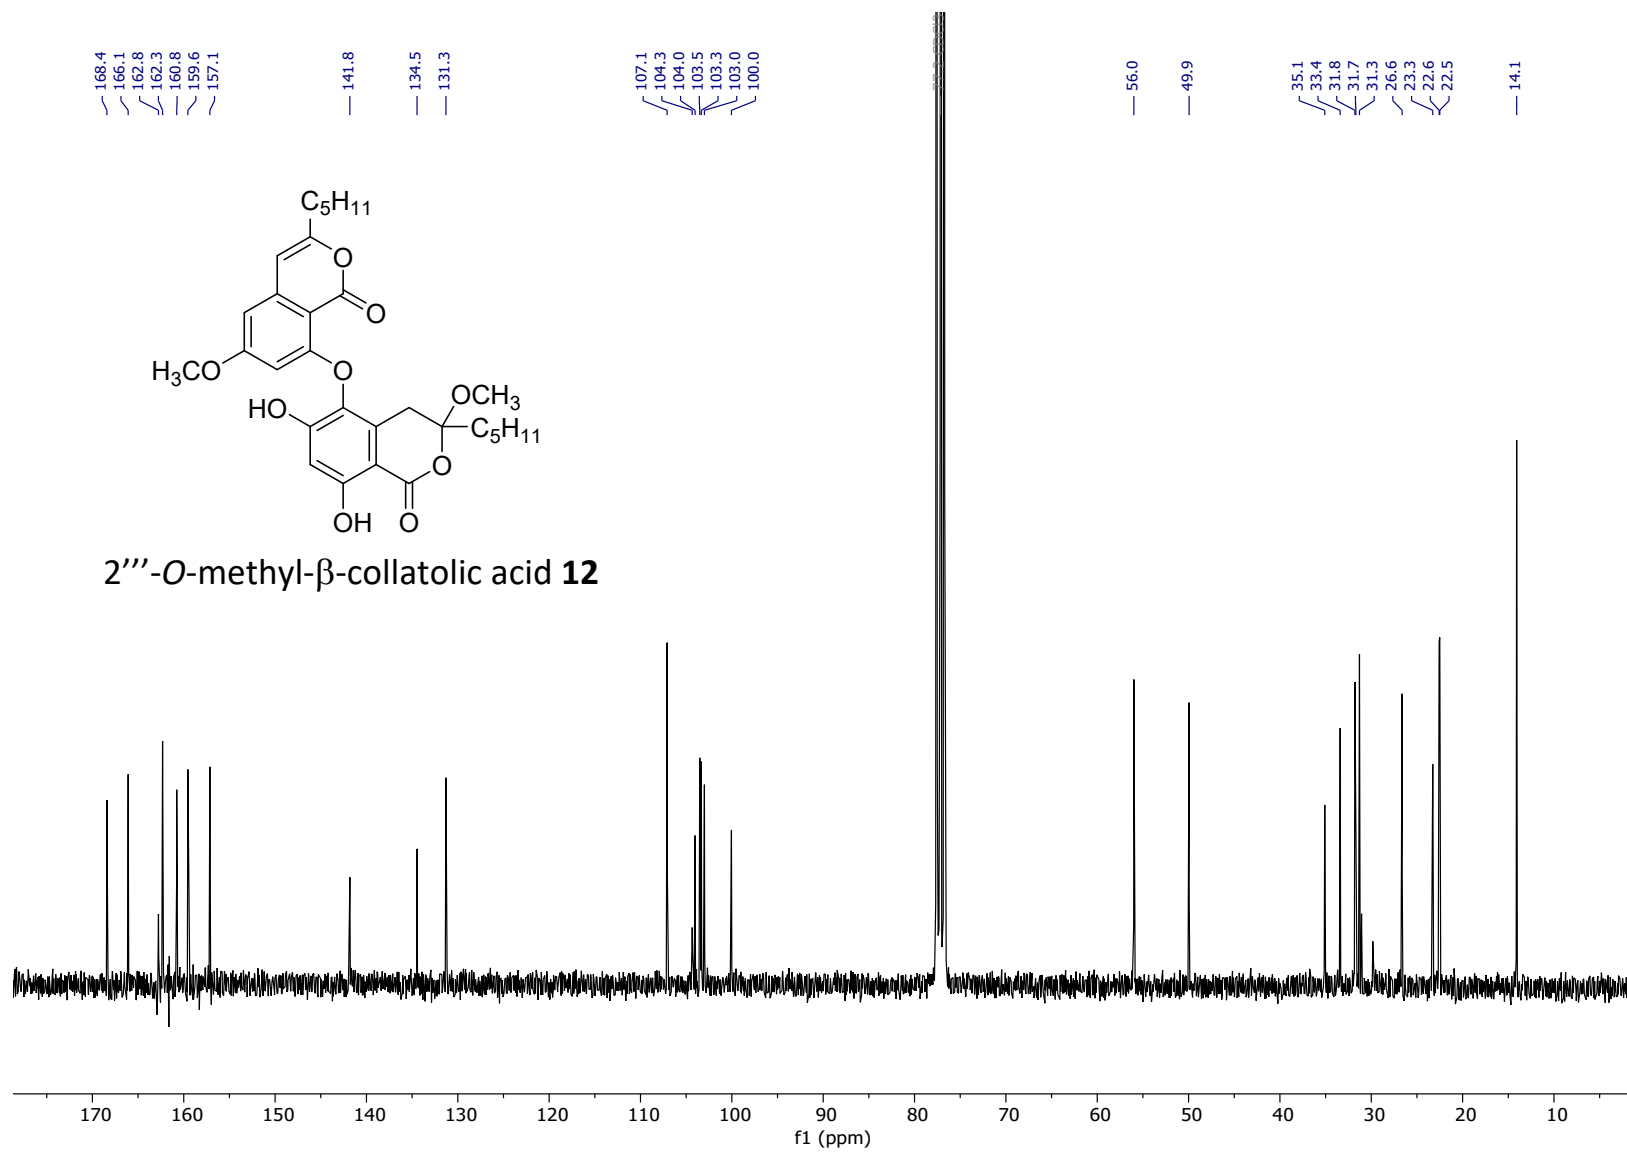

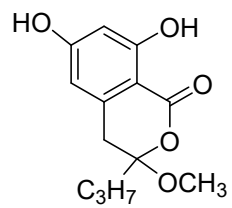

Compound **13'**

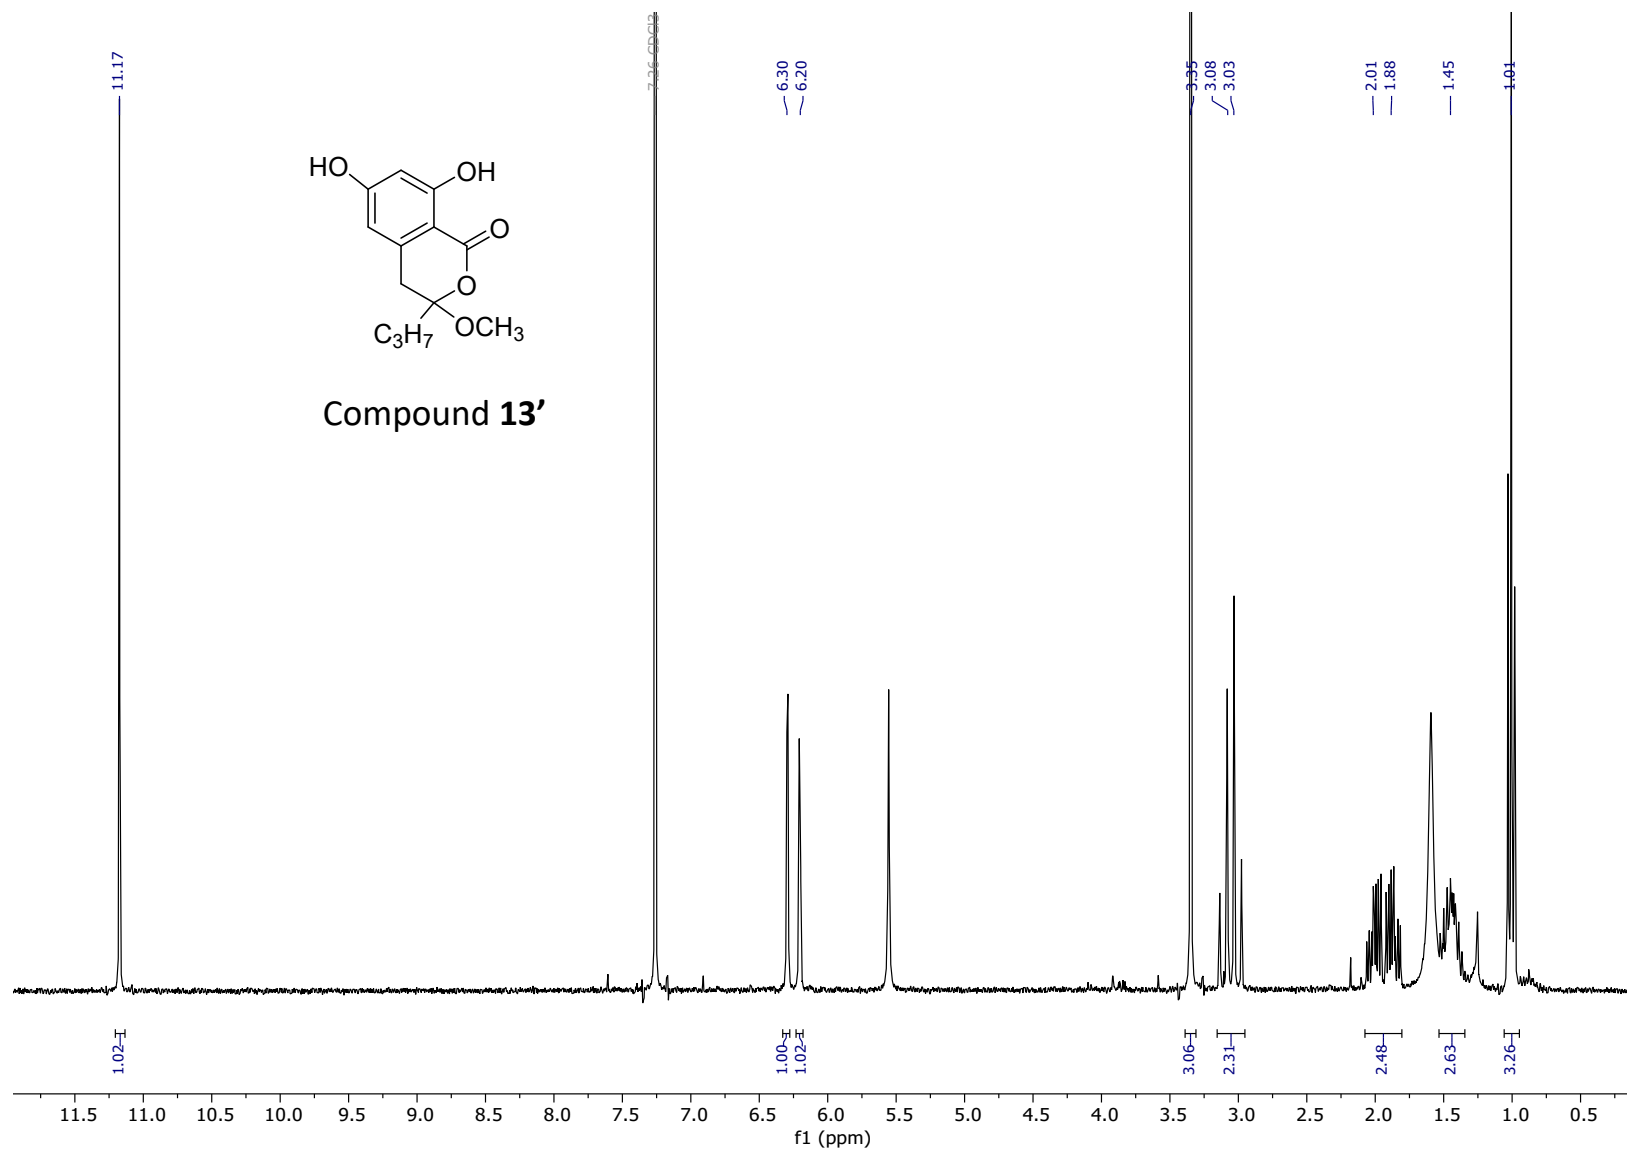

— 168.8  
— 164.4  
— 162.5

— 140.4

— 107.4  
— 107.1  
— 101.9  
— 101.8

— 50.1

— 37.3  
— 36.3

— 17.0  
— 14.2

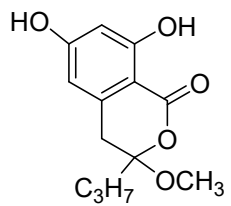

Compound 13'

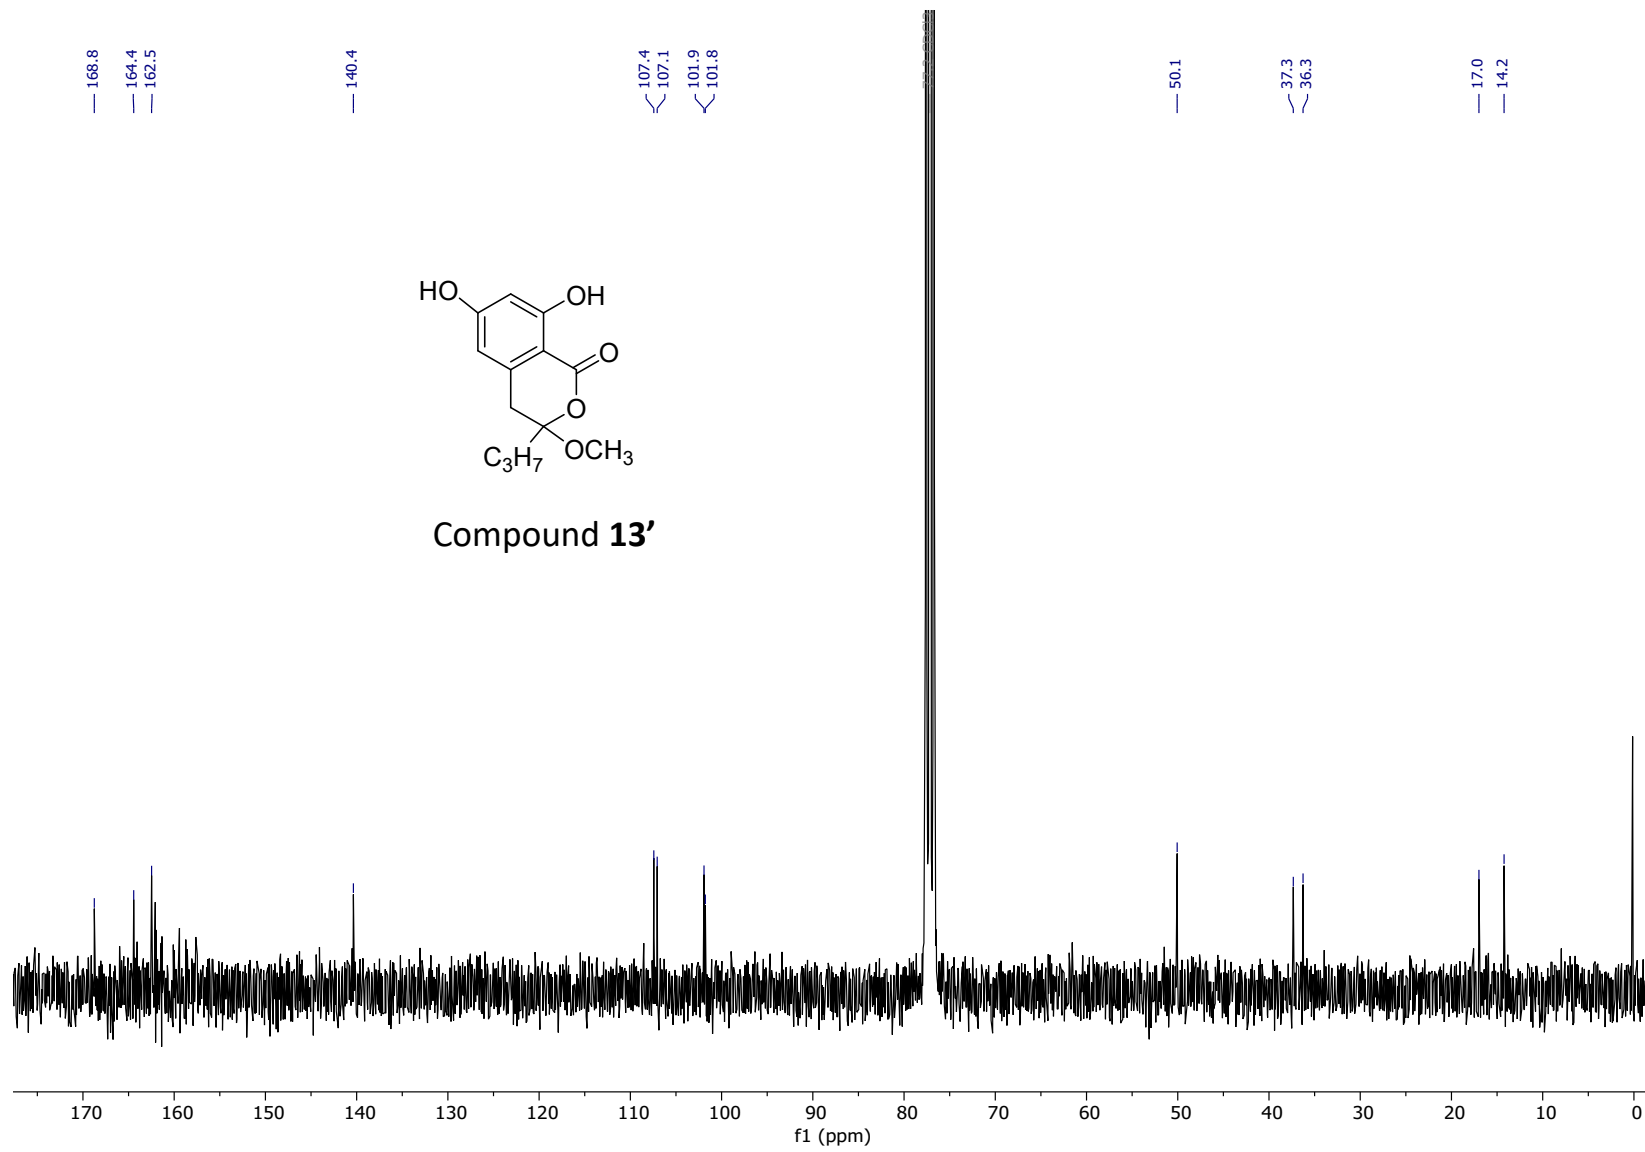

#### S4. Complementary $^1\text{H}$ and $^2\text{H}$ NMR for **2** and **6ka**

$2'$ -*O*-methylmicrophyllinic acid in  $\text{CD}_3\text{COCD}_3$  (exchange H/D) after 30 min

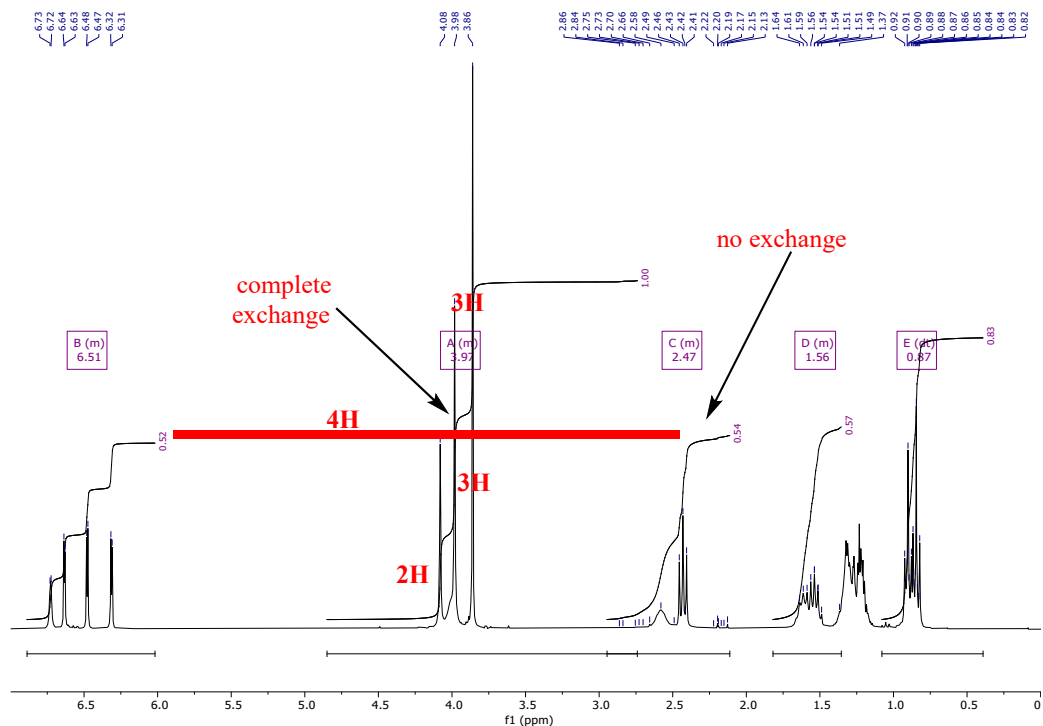

Exchange complete for  $\text{CH}_2-1'''$  Lower exchange for  $\text{CH}_2-3'''$

$^2\text{H}$  NMR confirmation in  $\text{CDCl}_3$

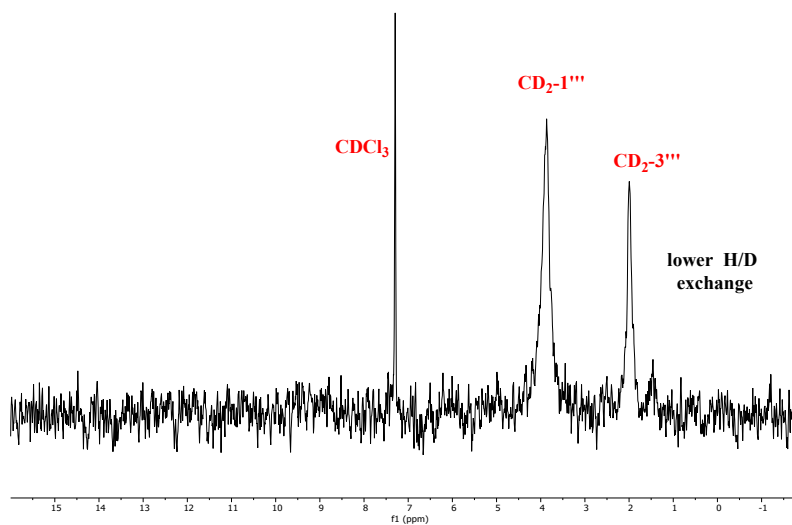

2'-O-methylmicrophyllinic acid in CDCl<sub>3</sub> after evaporation, dissolution in acetone  
(inverse exchange D/H) evaporation and NMR in CDCl<sub>3</sub>

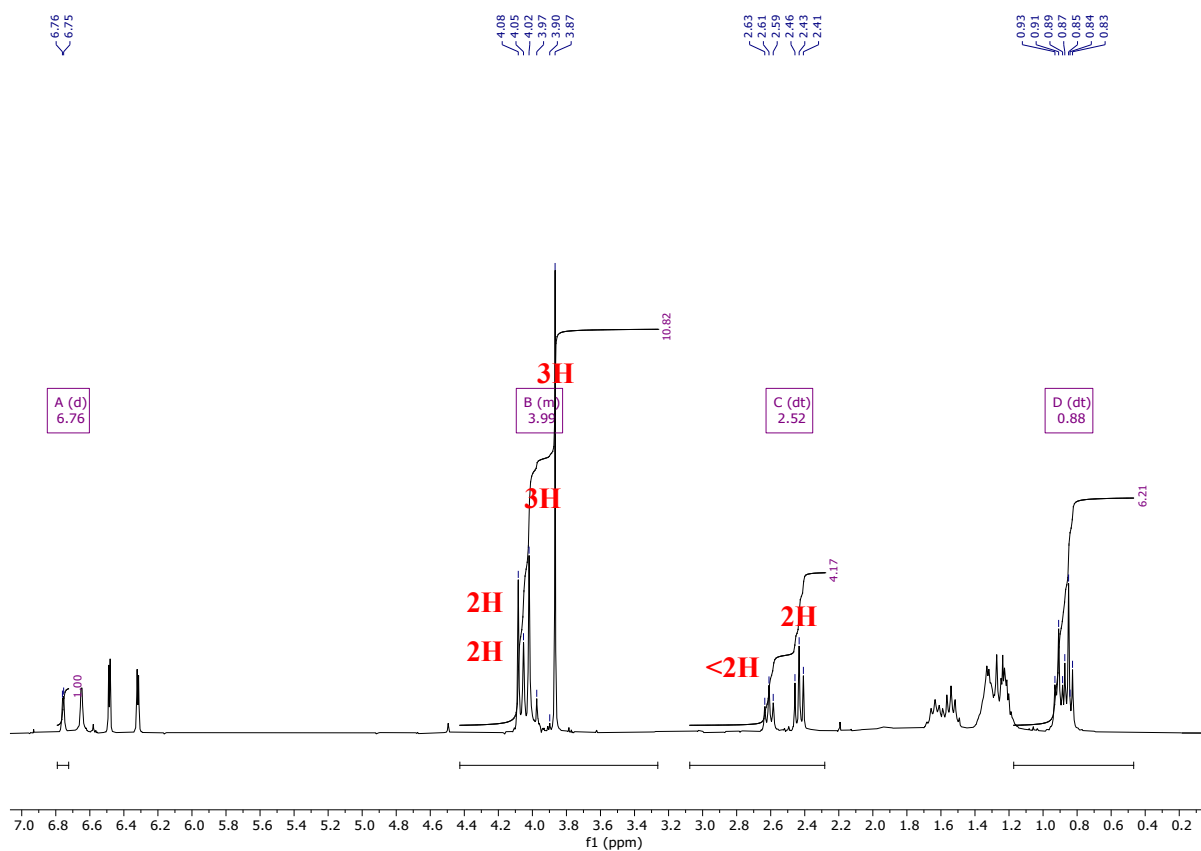

Inverse exchange: complete for CH<sub>2</sub>-1''' and lower for CH<sub>2</sub>-3'''

The exchange is slow explaining the forms of the signal and the integration values.



# $\alpha$ -collatolic acid (CDCl<sub>3</sub>)

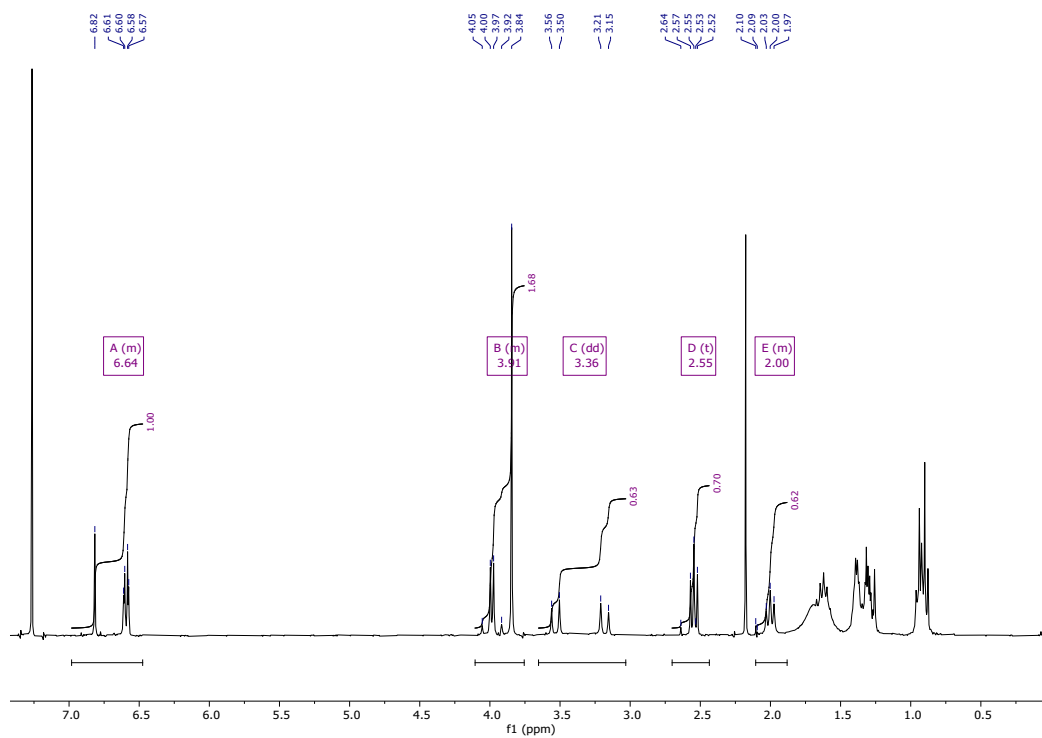

# $\alpha$ -isocollatolic acid ( $d_6$ -acetone)

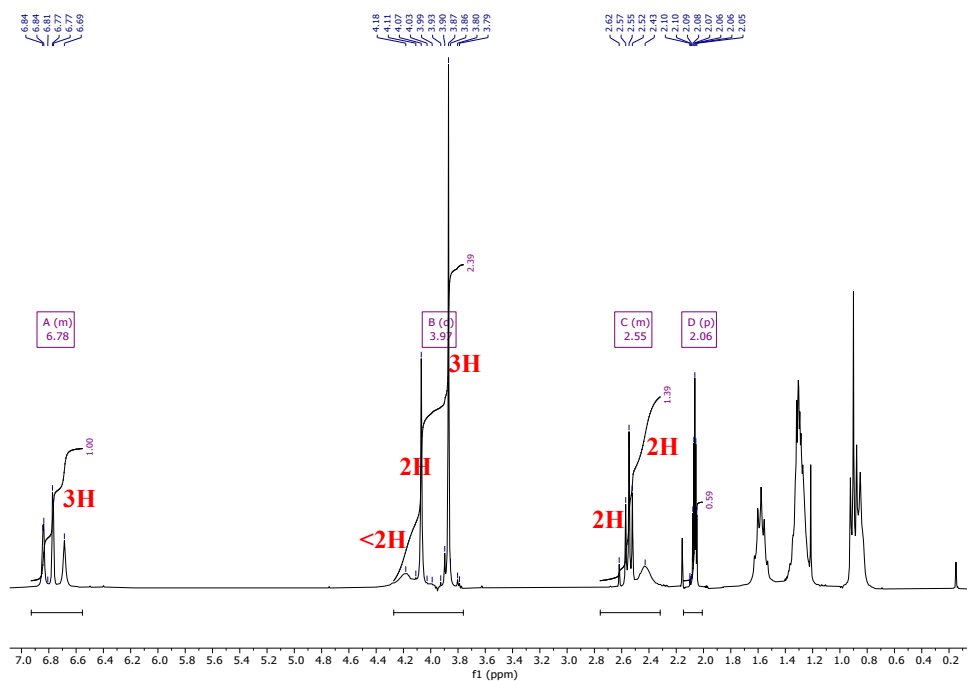

$^1\text{H}$  NMR data just after dissolution: partial H/D exchange and coalescence.

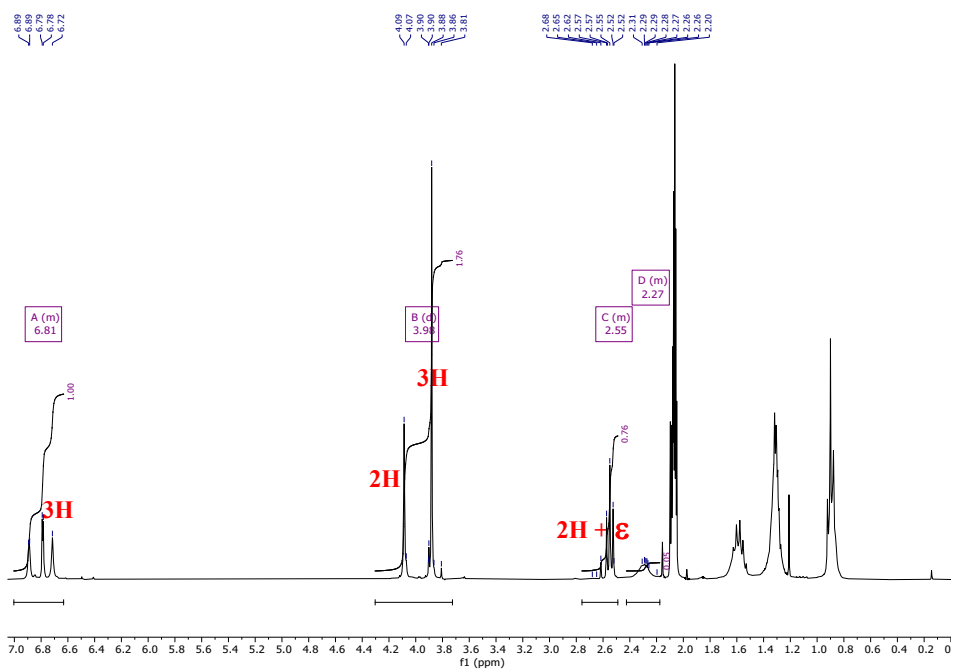

$^1\text{H}$  NMR data after 3 days: complete H/D exchange.

S5. NMR spectra of compounds previously reported<sup>1-3</sup> : **1**, **4**, **5**, **6**, **7** and of physodic acid and physodone

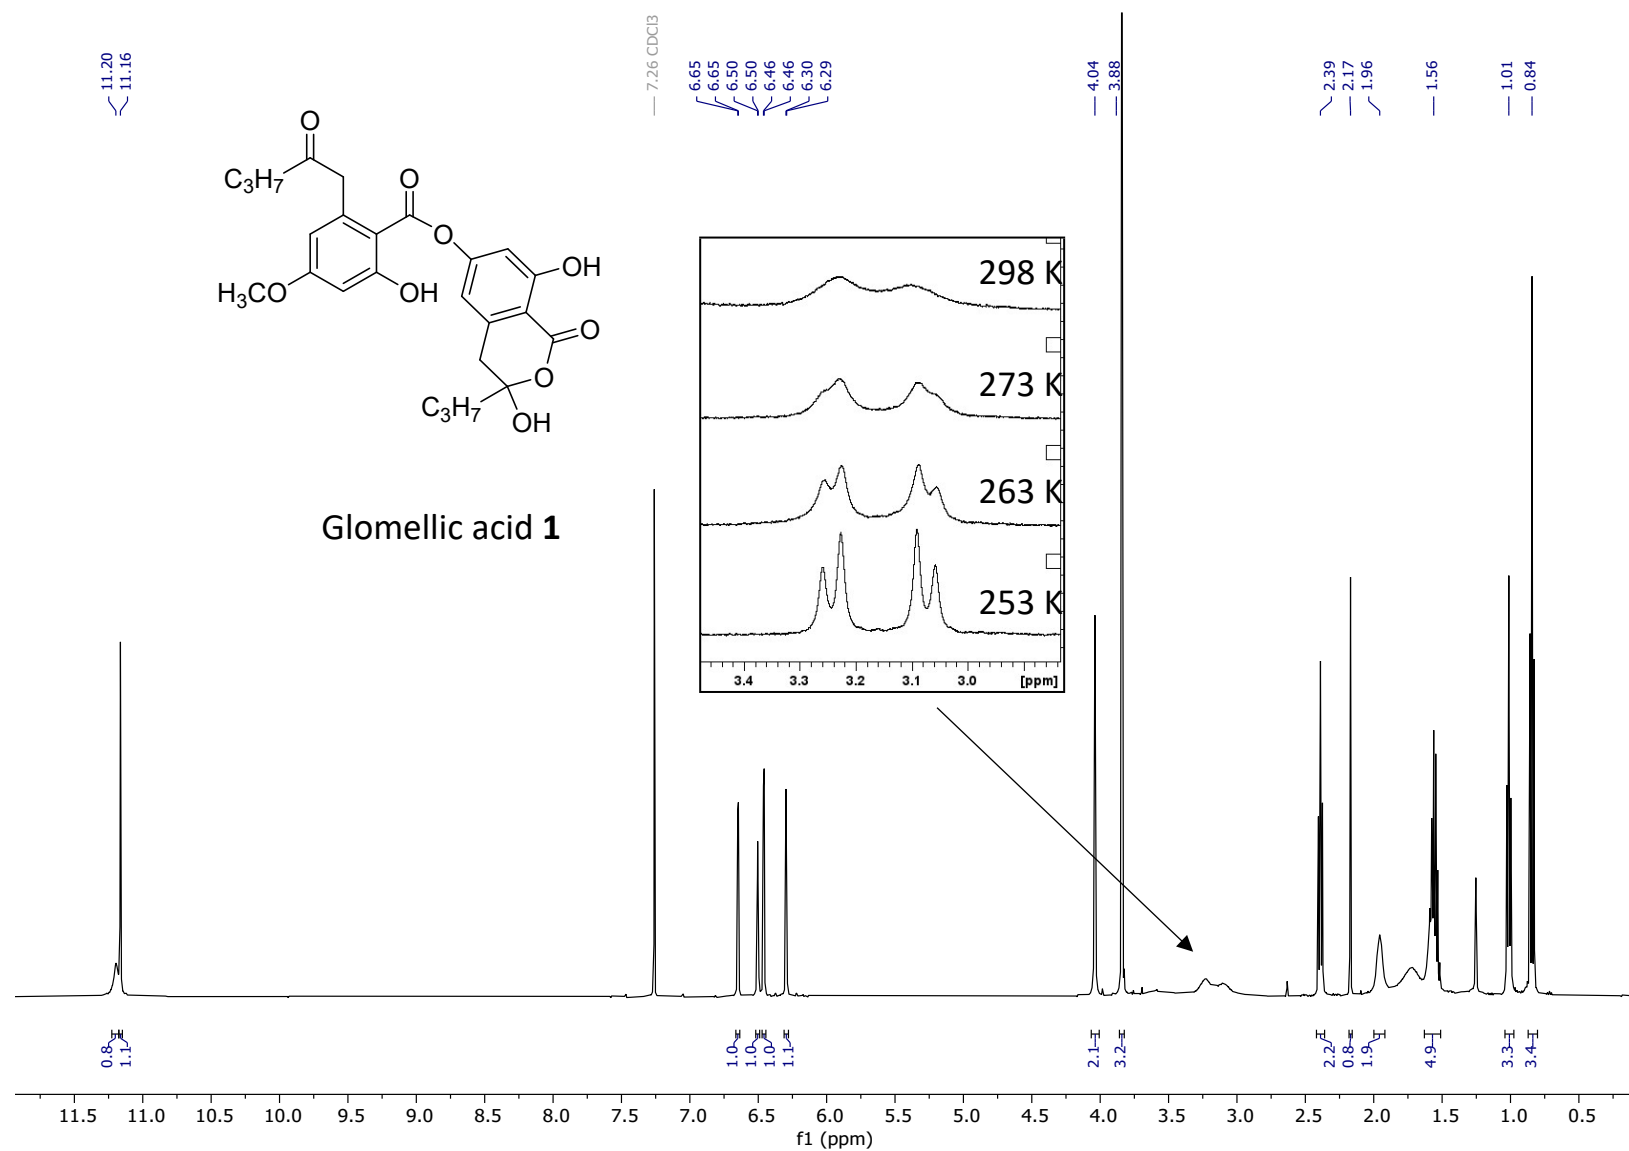

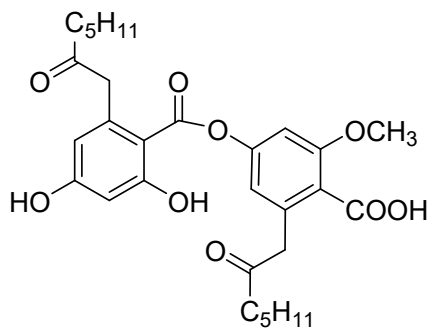

Arthoniaic acid **4**

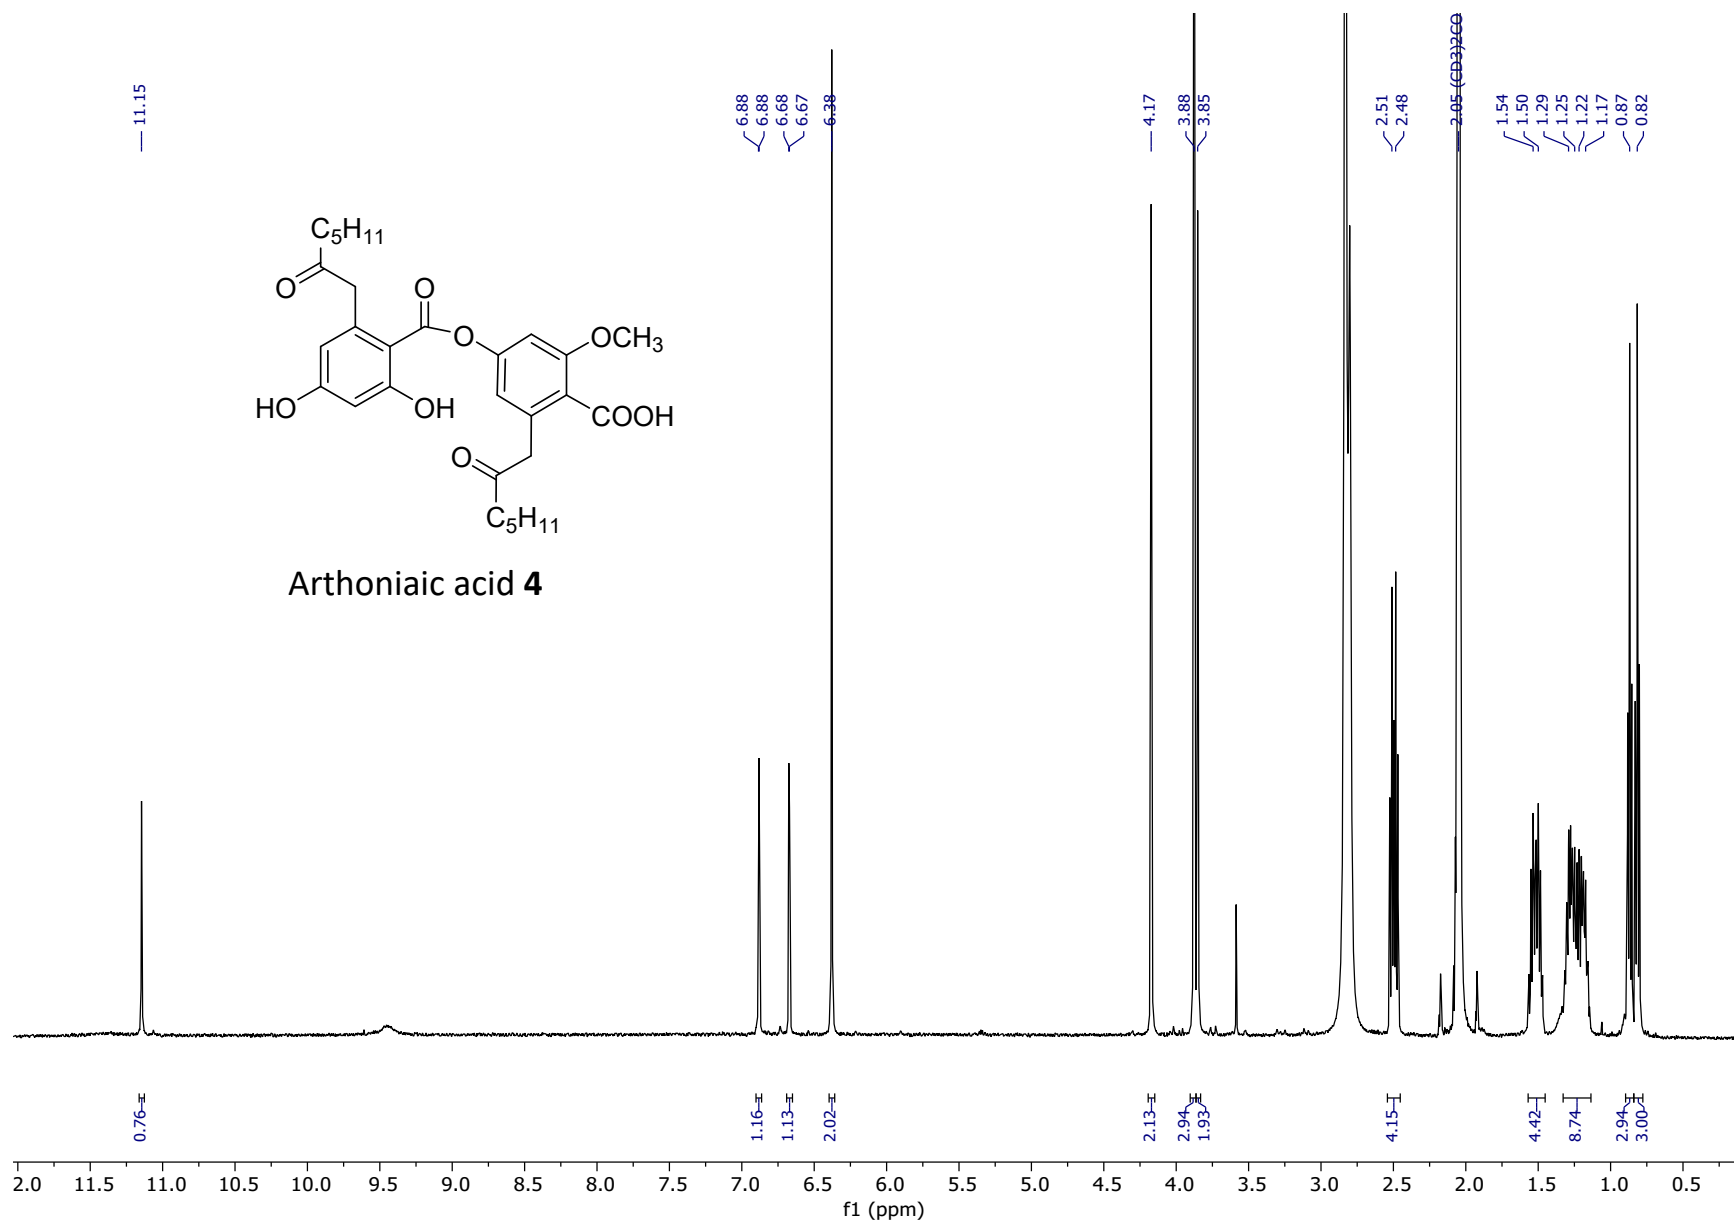

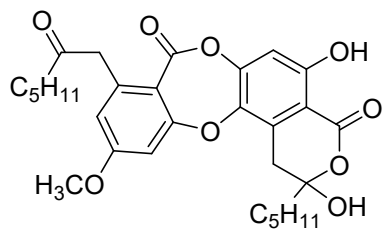

$\alpha$ -collatolic acid **5**

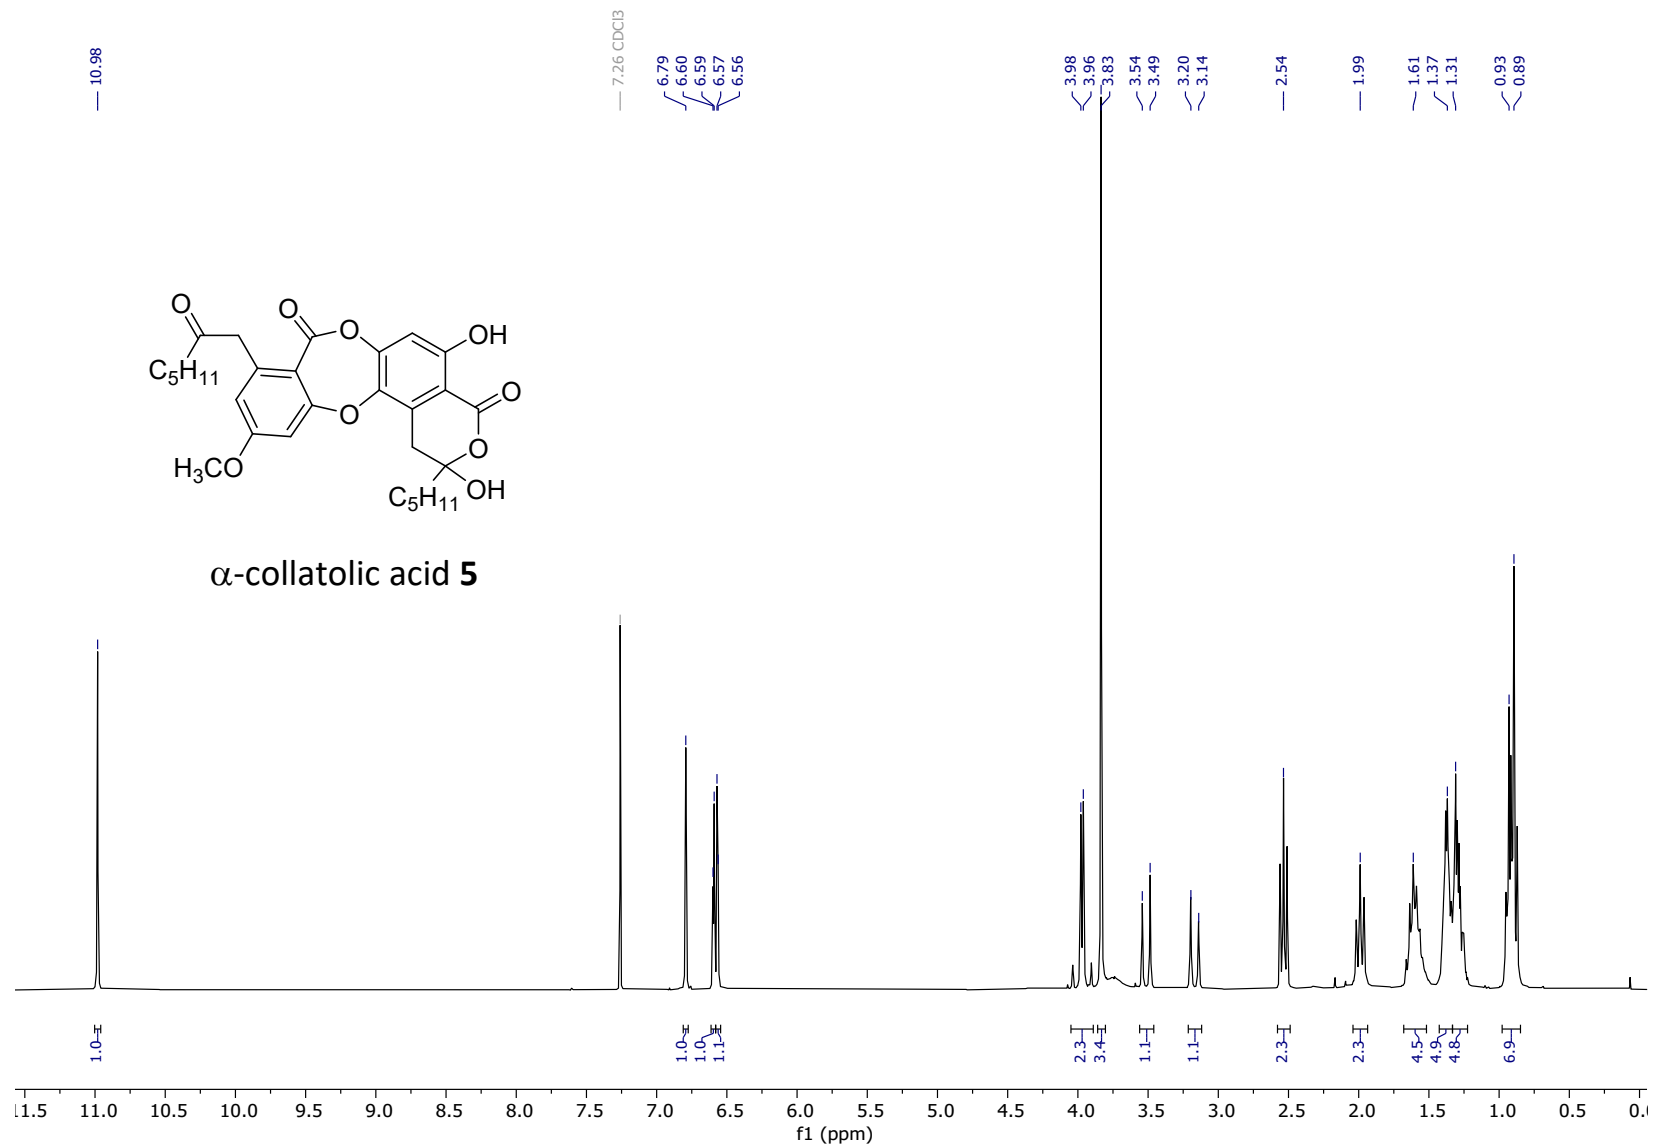

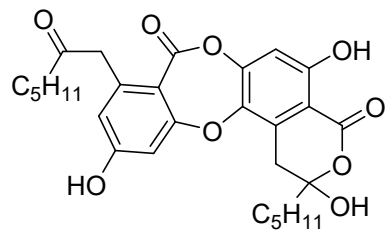

$\alpha$ -alectoronic acid **6**

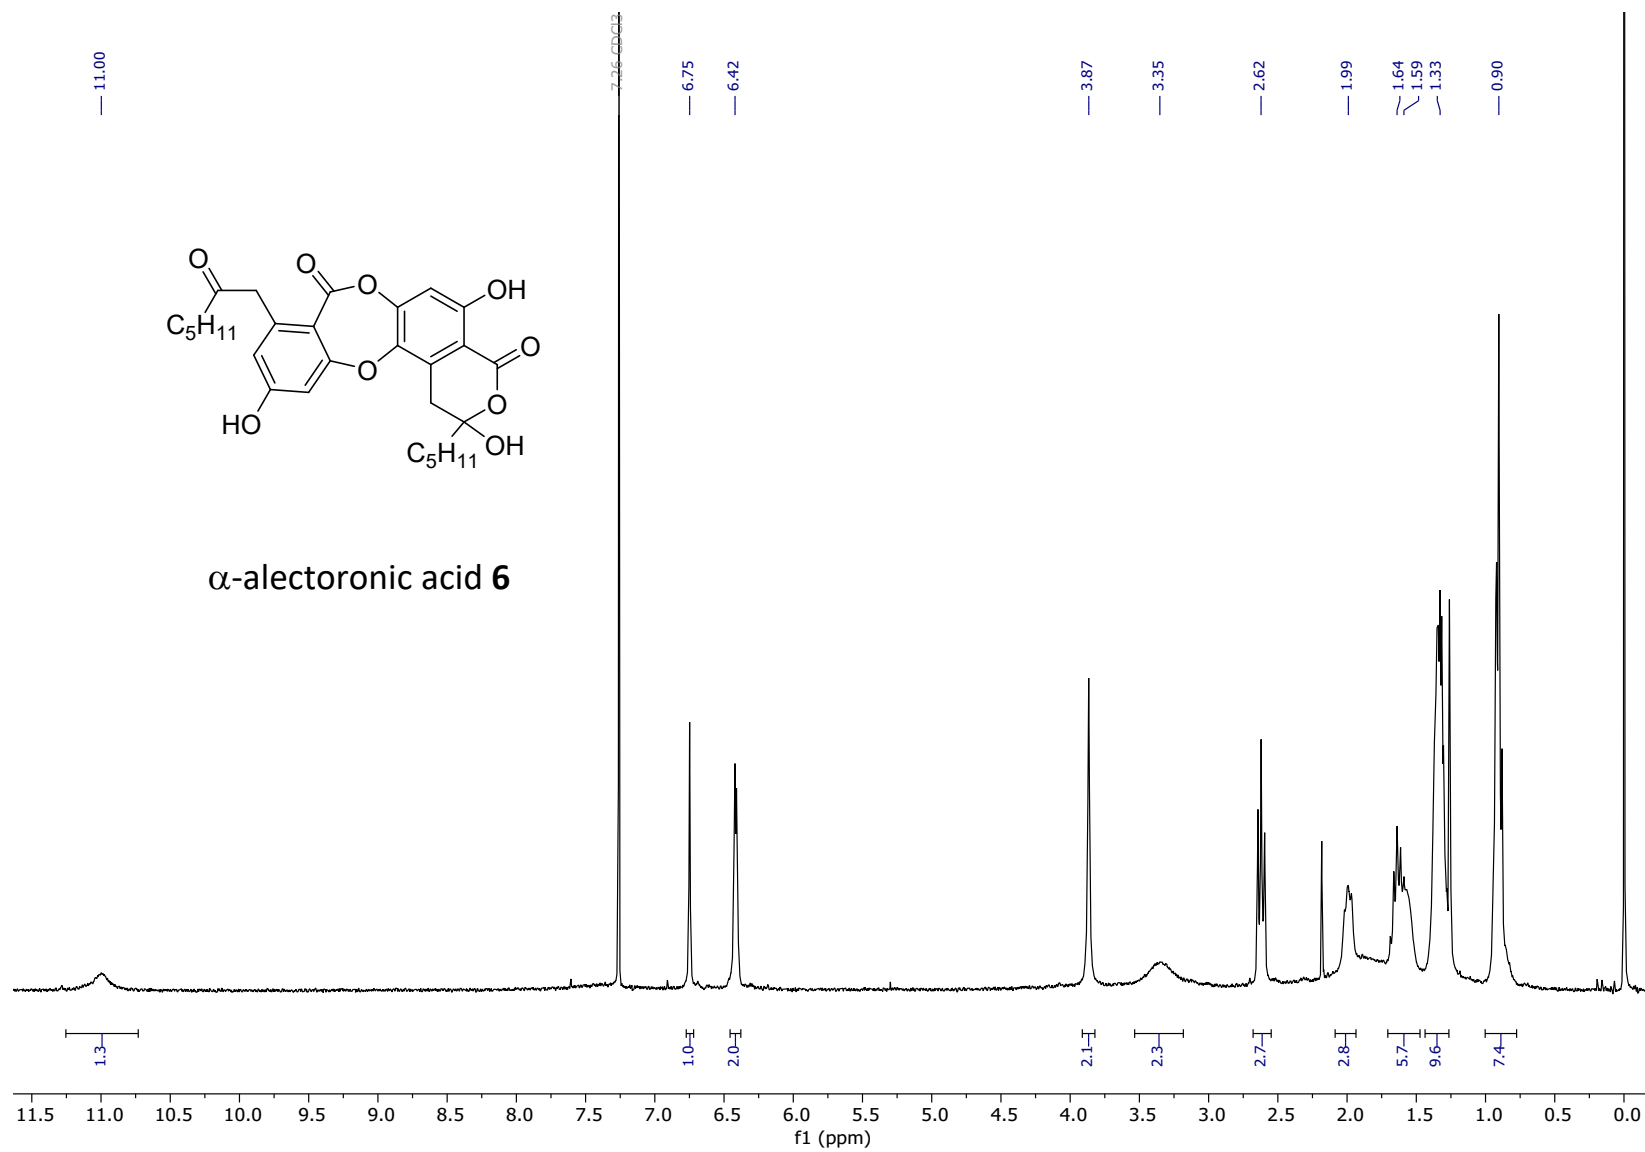

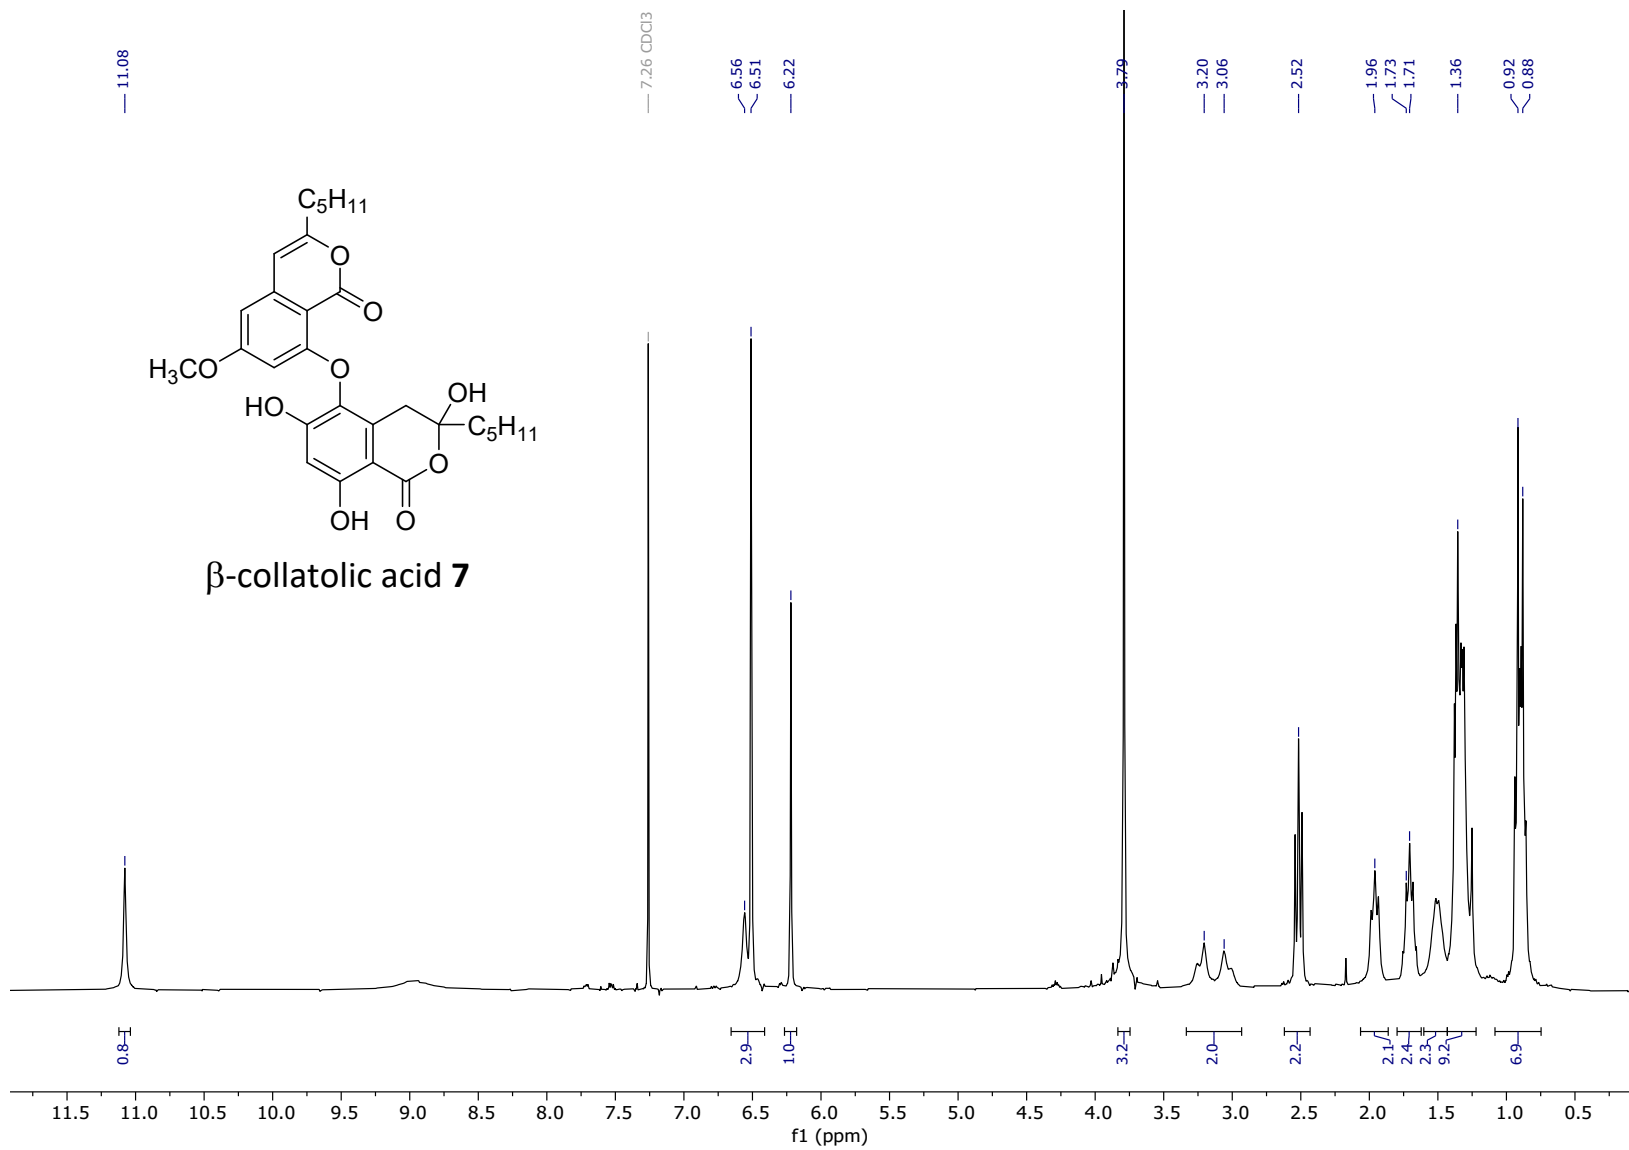

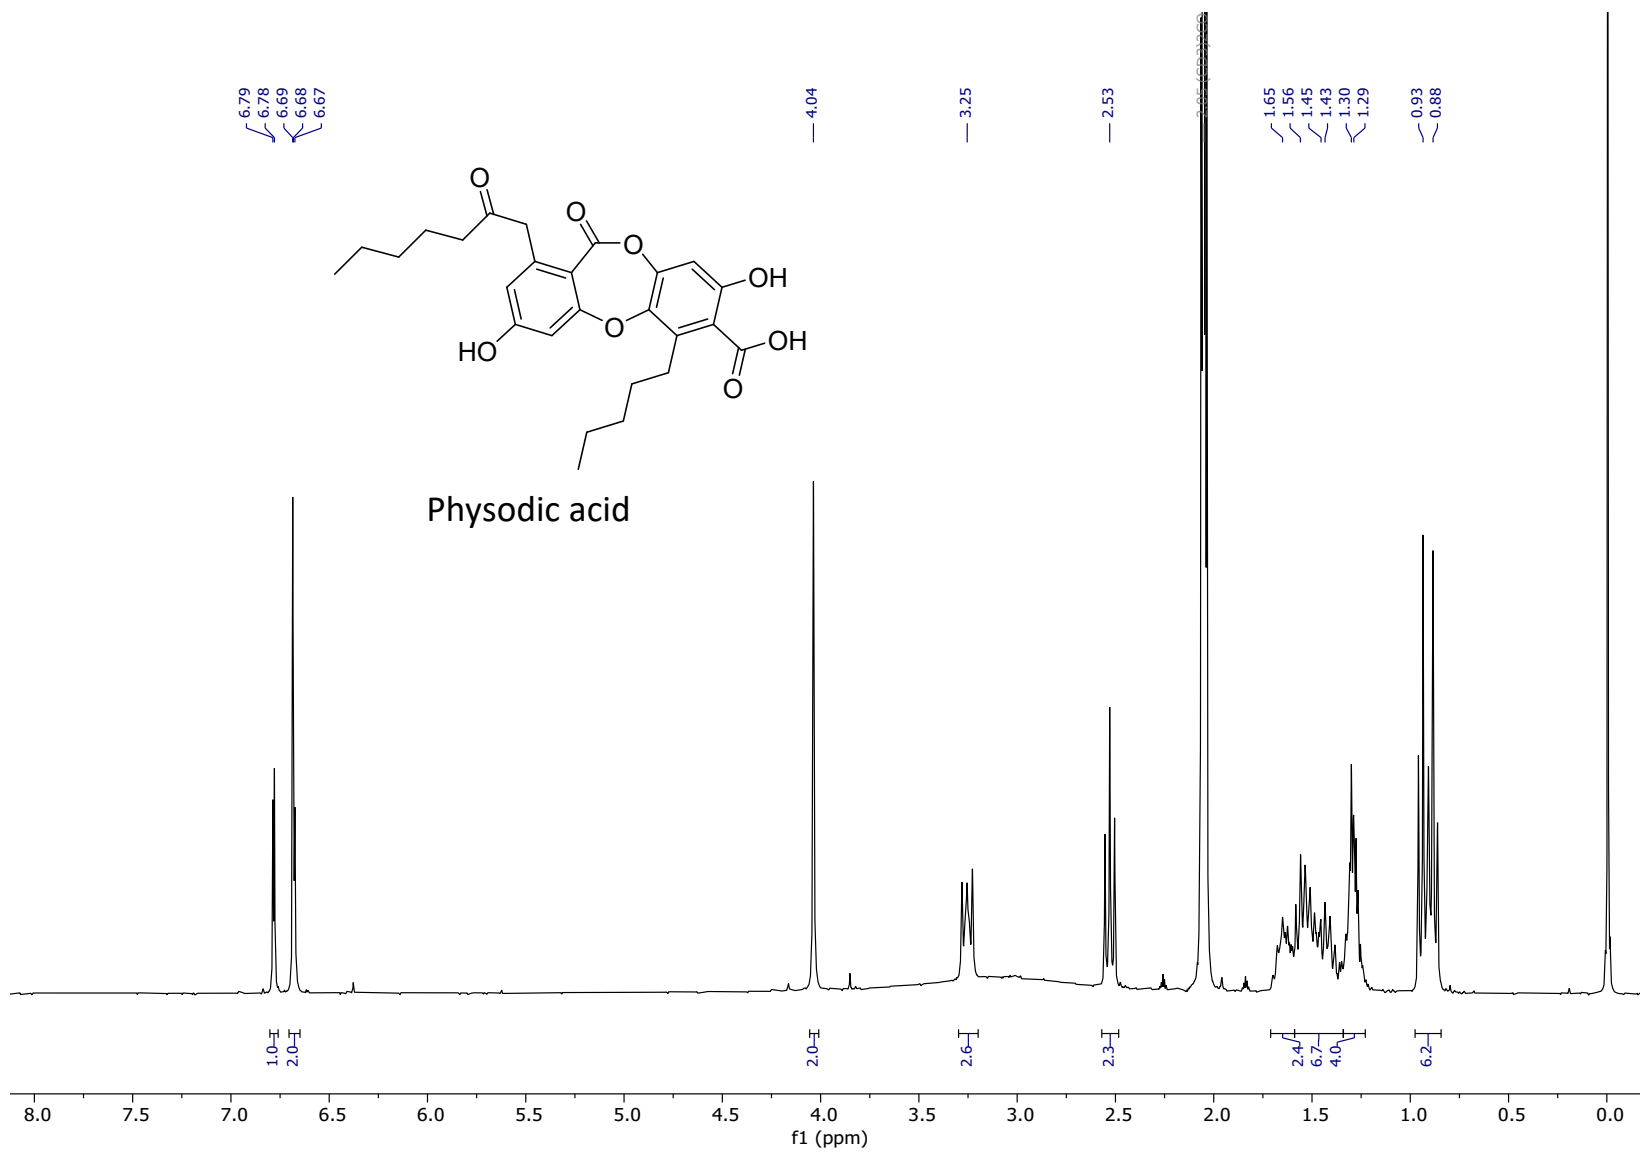



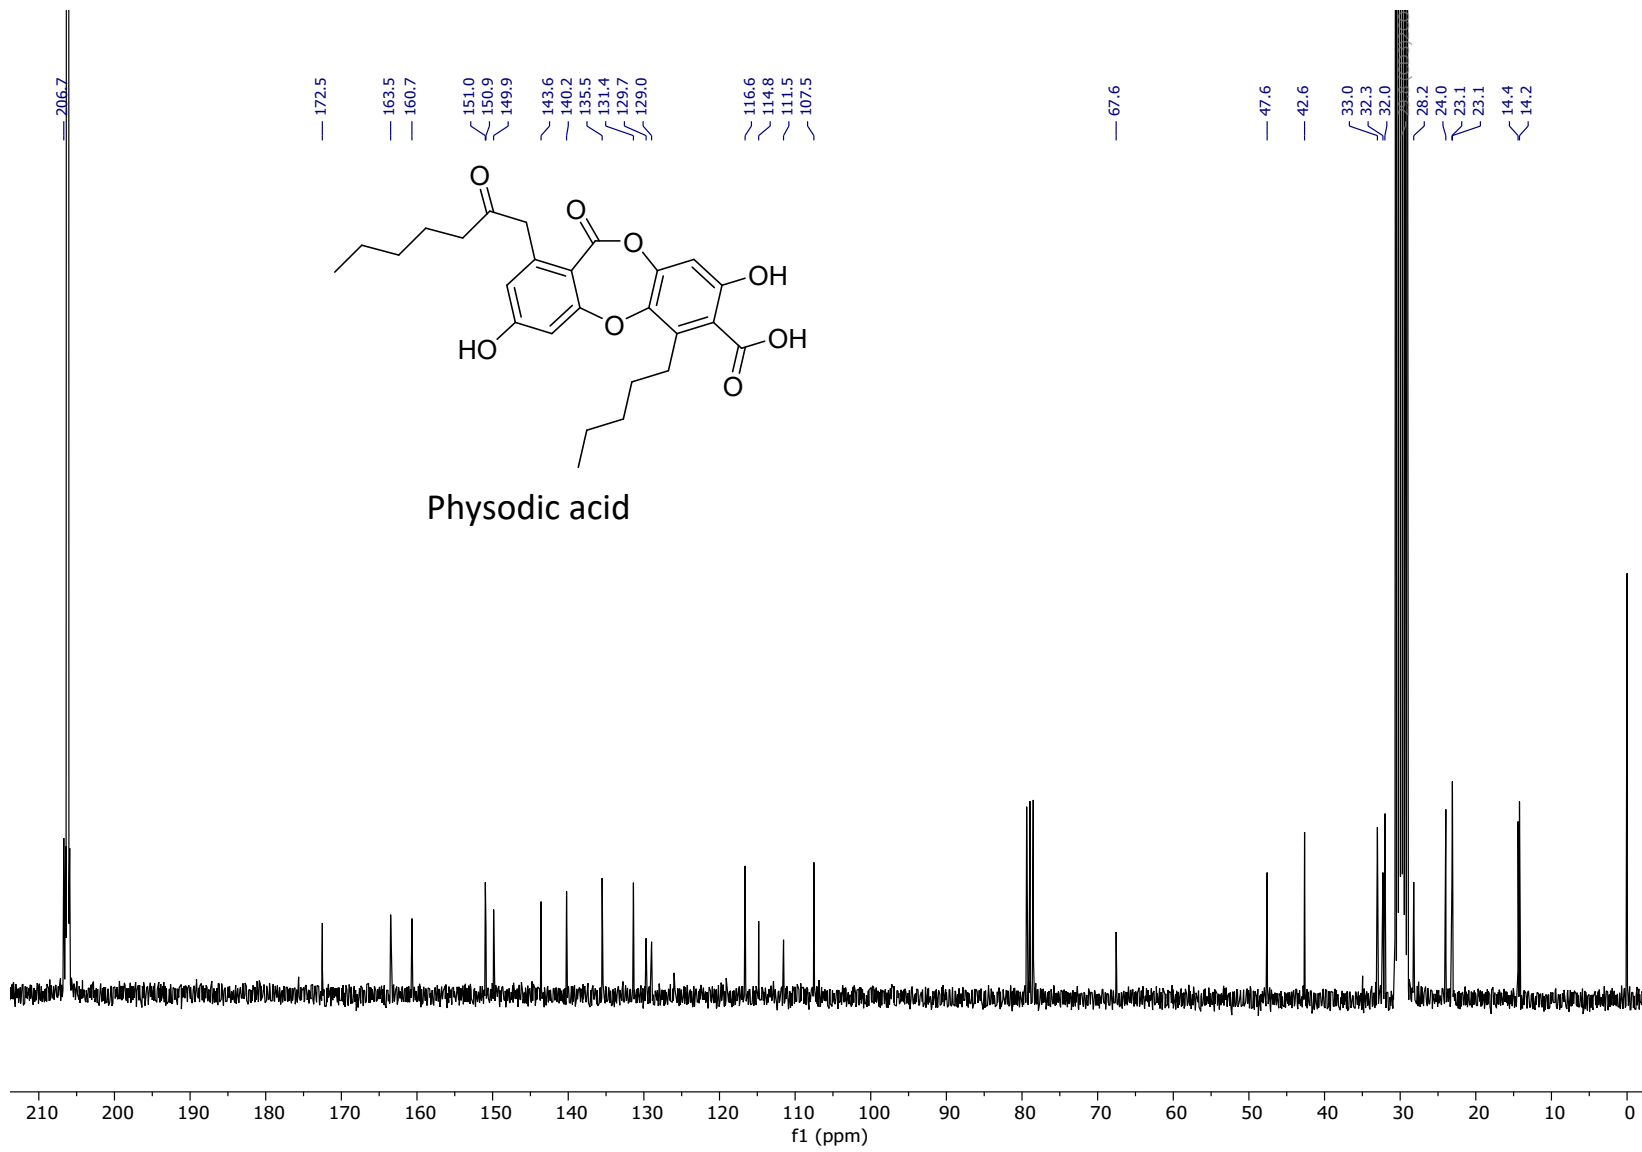

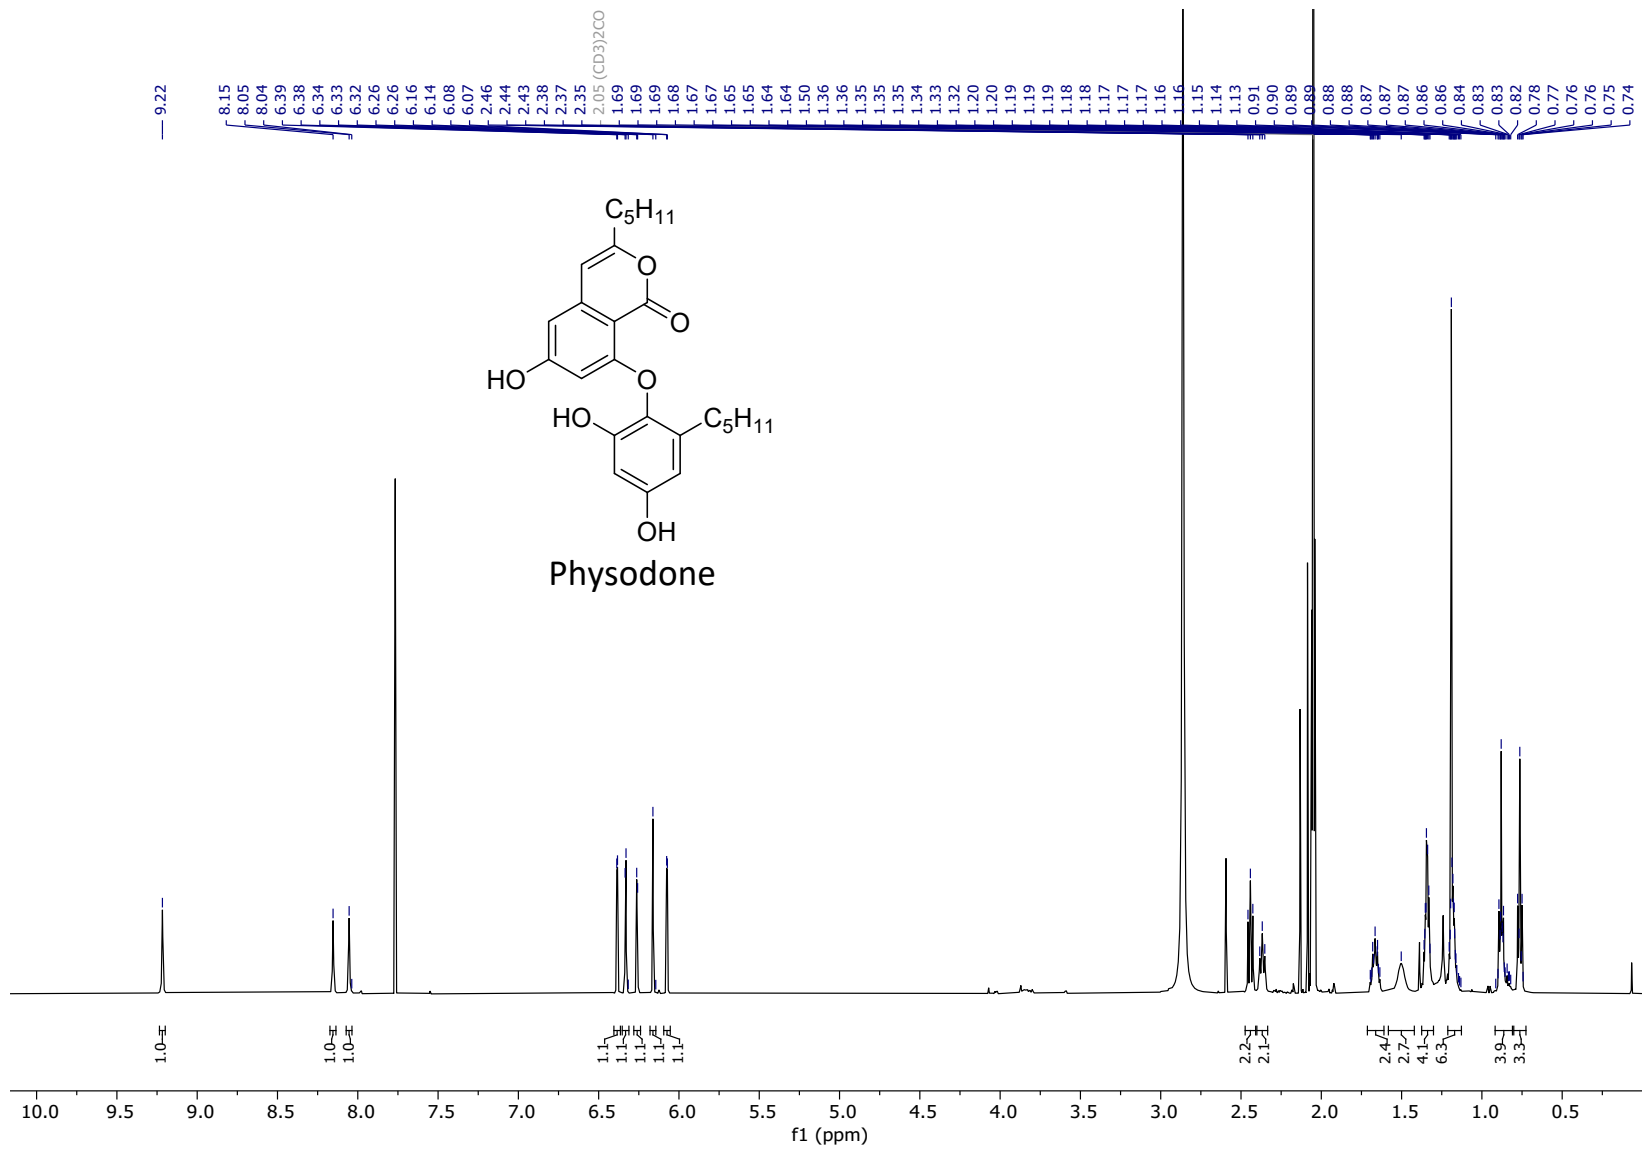

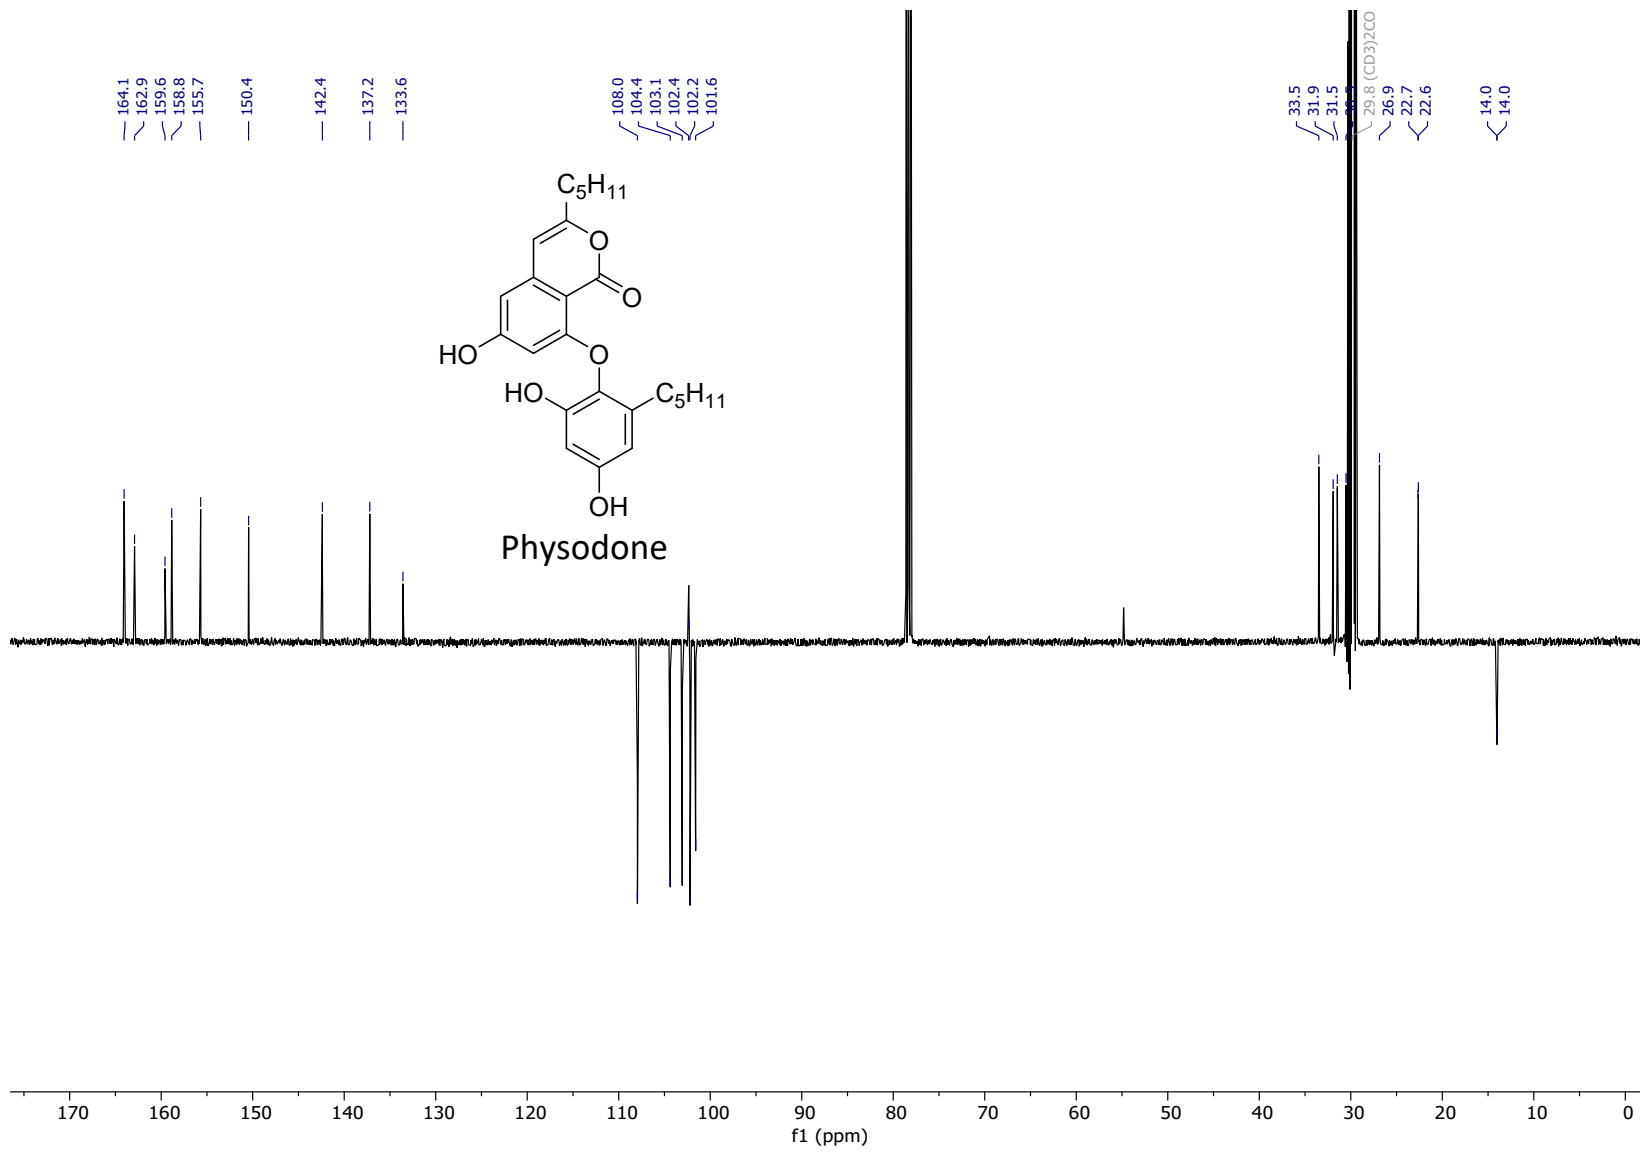

S6. Example of reaction checking by  $^1\text{H}$  NMR and keto-enol study

Isomerization of  $\alpha$ -collatolic acid 5 into  $\beta$ -collatolic acid 7. Aromatic hydrogen atoms.

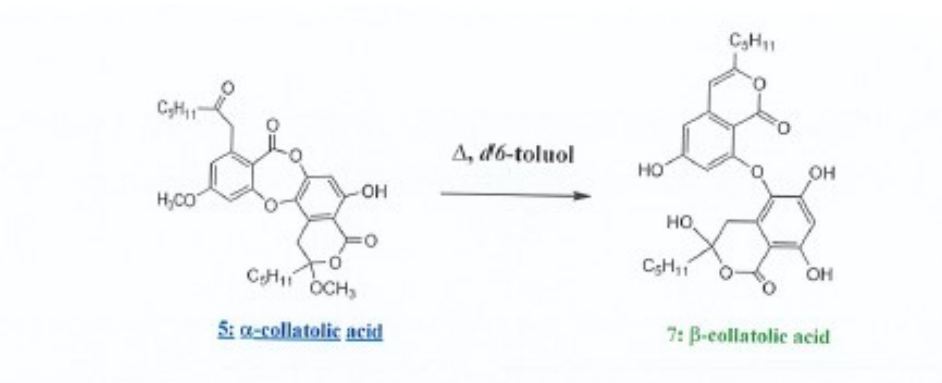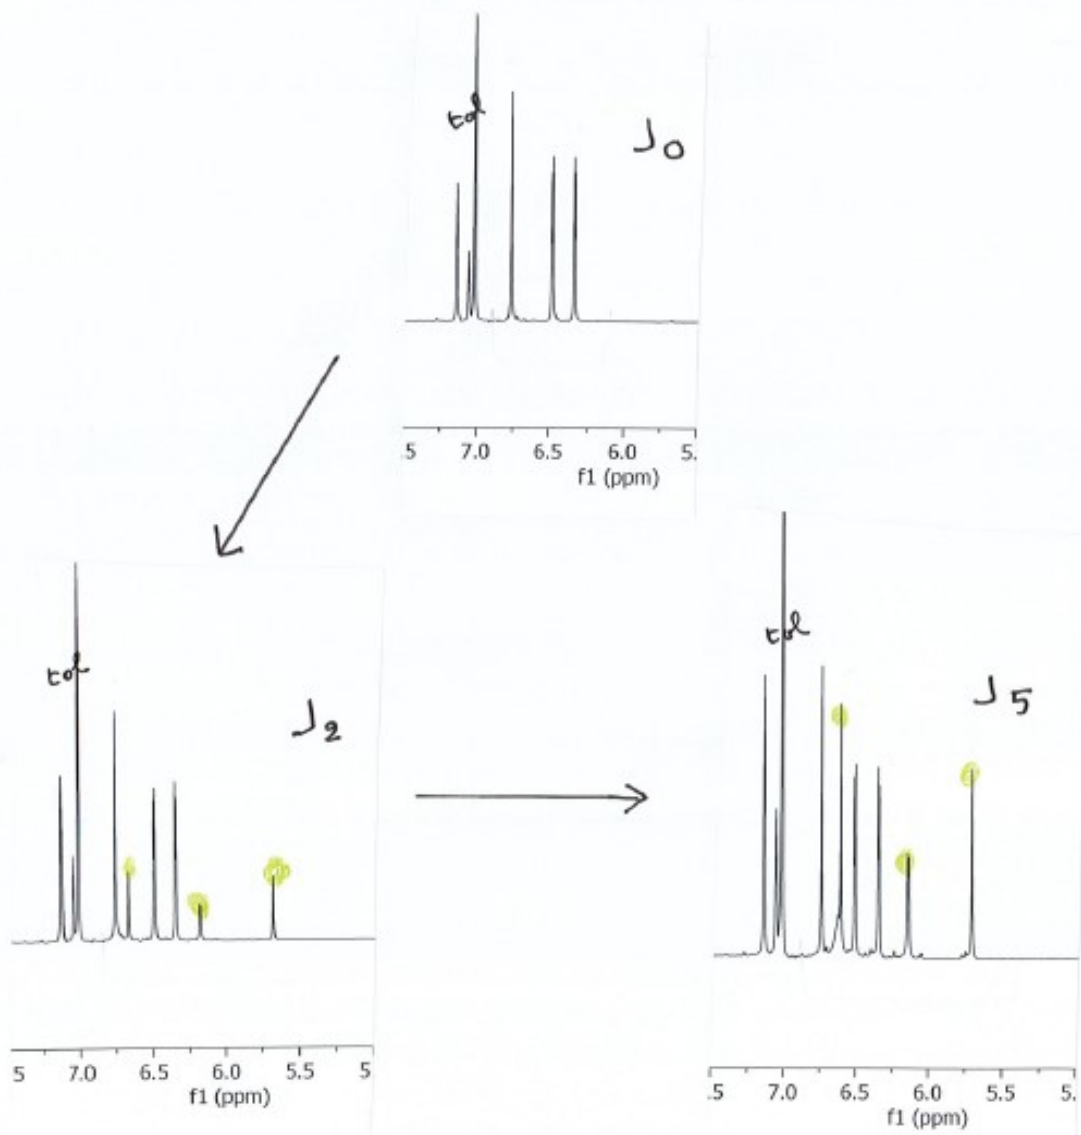

Dehydration of  $\alpha$ -collatolic acid 5 into  $\alpha$ -collatone 8.

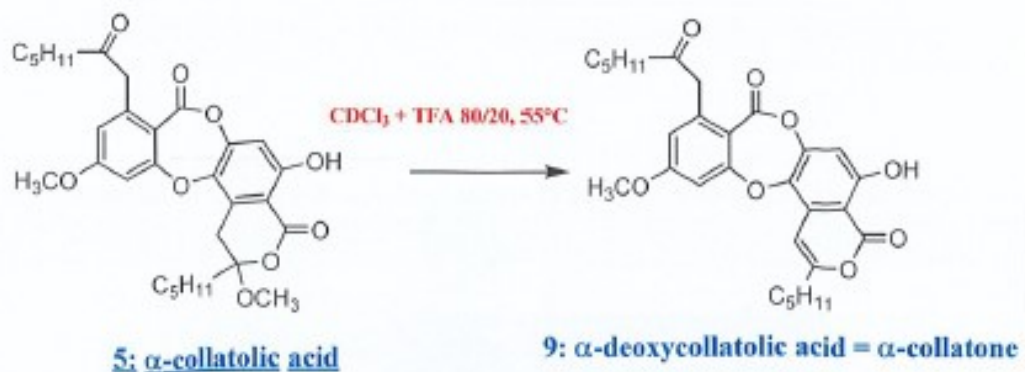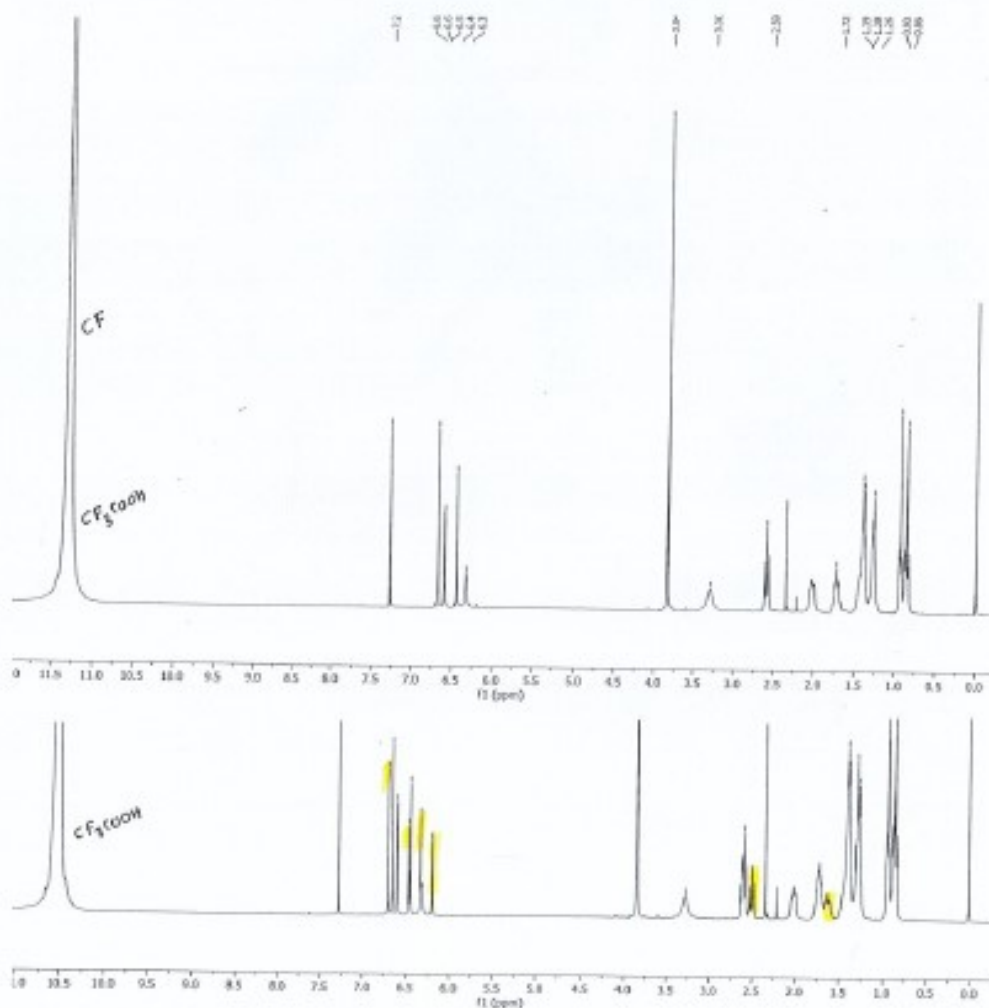

# Dehydration of $\beta$ -collatolic acid 7 into $\beta$ -collatone 9.

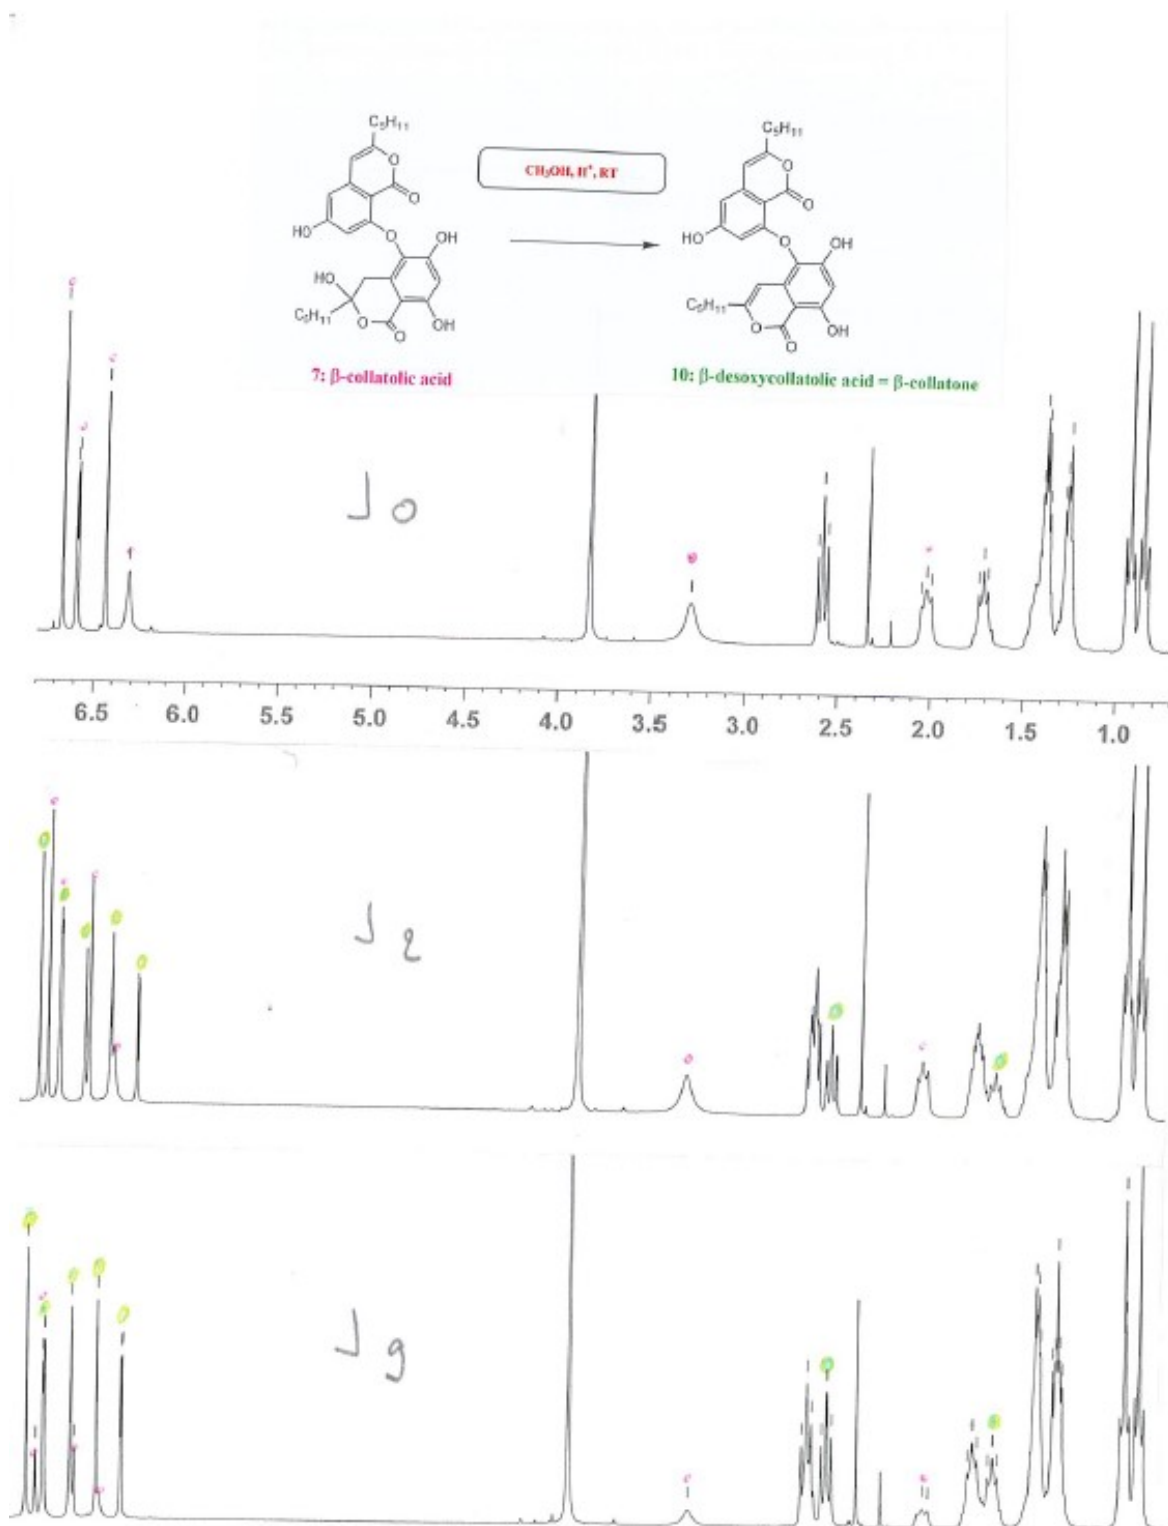

## S7. Crystal structure report for $\beta$ -collatone 9

(C<sub>29</sub>H<sub>32</sub>O<sub>8</sub>); M = 508.54.

A suitable crystal for X-ray diffraction single crystal experiment (colourless plate, dimensions = 0.280 x 0.230 x 0.060 mm) was selected and mounted on the goniometer head of a D8 Venture (Bruker-AXS) diffractometer equipped with a CMOS-PHOTON70 detector [\*], using Mo-K $\alpha$  radiation ( $\lambda = 0.71073 \text{ \AA}$ , multilayer monochromator) at T = 150(2) K. Crystal structure has been described in orthorhombic symmetry and P b c a (I.T.#61) centric space group. Cell parameters have been refined as follows: a = 14.8340(12), b = 12.7431(9), c = 27.038(2)  $\text{\AA}$ , V = 5110.9(7)  $\text{\AA}^3$ . Number of formula unit Z is equal to 8 and calculated density d and absorption coefficient  $\mu$  values are 1.322 g.cm<sup>-1</sup> and 0.096 mm<sup>-1</sup> respectively. Crystal structure was solved by dual-space algorithm using SHELXT program [1], and then refined with full-matrix least-squares methods based on F2 (SHELXL program [2]). All non-Hydrogen atoms were refined with anisotropic atomic displacement parameters. Except Hydrogen atoms linked to Oxygen atoms that were introduced in the structural model through Fourier difference maps analysis, H atoms were finally included in their calculated positions and treated as riding on their parent atom with constrained thermal parameters. A final refinement on F2 with 5857 unique intensities and 355 parameters converged at  $\omega R(F2) = 0.1704$  (RF = 0.0840) for 5062 observed reflections with ( $I > 2\sigma$ ).

1. G. M. Sheldrick, Acta Cryst. A71 2015 3-8
2. Sheldrick G.M., Acta Cryst. C71 2015 3-8

### Structure visualization

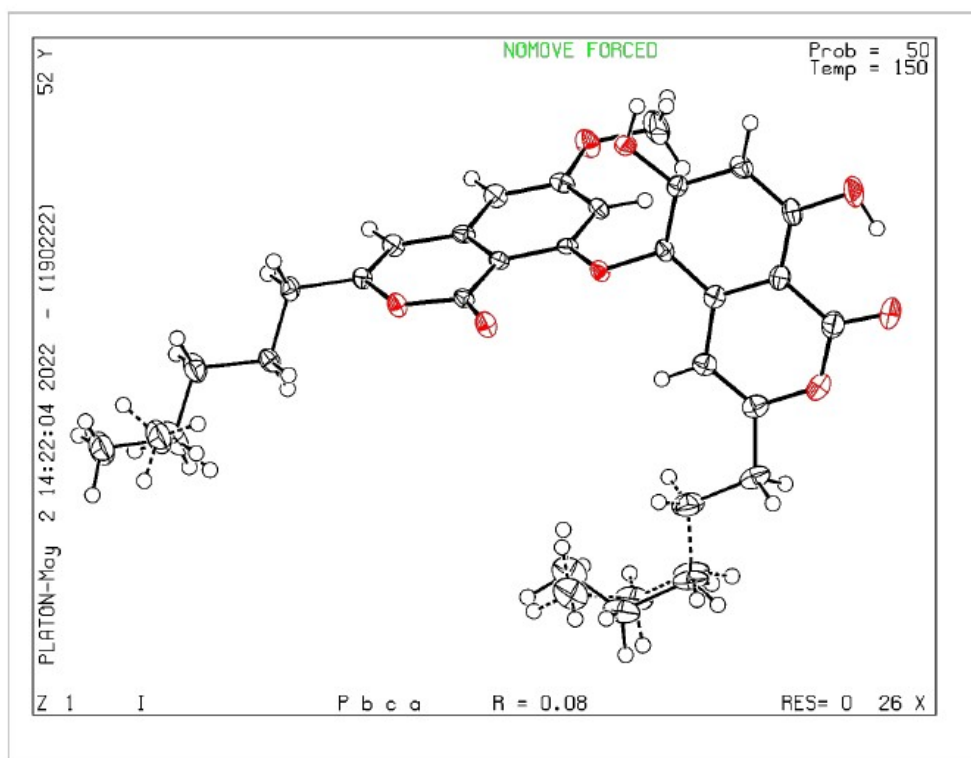

## Data collection strategy details

Software : BIS V6.2.15/2021-03-15 && APEX4 2021.10-0  
Number of scans : 3  
Total number of frames [\*] : 302  
Total length of scans [\*] : 151.00 (deg.)  
Rotation speed [\*] : ?  
Total exposition time [\*] : 1 h 40.7 min.

[\*] fast scan not included

| Scan   | Time(s) | Width | DX(mm) | Frames | Range | 2Theta | Omega | Phi   | Chi  | T(K)  |
|--------|---------|-------|--------|--------|-------|--------|-------|-------|------|-------|
| 1 Fast | 4.0     | 1.00  | 34.0   | 180    | 180.0 | 0.0    | 0.0   | 0.0   | 54.7 | 150.0 |
| 2 Phi  | 20.0    | 0.50  | 34.0   | 302    | 151.0 | 0.1    | 270.3 | 176.5 | 24.0 | 150.0 |



## ... Crystal data ...

|                             |                                                                                                                              |
|-----------------------------|------------------------------------------------------------------------------------------------------------------------------|
| Empirical formula           | C <sub>29</sub> H <sub>32</sub> O <sub>8</sub>                                                                               |
| Formula weight              | 508.54 g/mol                                                                                                                 |
| Temperature                 | 150(2) K                                                                                                                     |
| Radiation type              | Mo-K $\alpha$                                                                                                                |
| Wavelength                  | 0.71073 Å                                                                                                                    |
| Crystal system, space group | orthorhombic, P b c a (I.T.#61)                                                                                              |
| Unit cell dimensions        | a = 14.8340(12) Å<br>b = 12.7431(9) Å<br>c = 27.038(2) Å<br>$\alpha = 90^\circ$<br>$\beta = 90^\circ$<br>$\gamma = 90^\circ$ |
| Volume                      | 5110.9(7) Å <sup>3</sup>                                                                                                     |
| Z, Calculated density       | 8, 1.322 g.cm <sup>-3</sup>                                                                                                  |
| Absorption coefficient      | 0.096 mm <sup>-1</sup>                                                                                                       |
| F(000)                      | 2160                                                                                                                         |
| Crystal size                | 0.280 x 0.230 x 0.060 mm                                                                                                     |
| Crystal color               | colourless                                                                                                                   |
| Crystal description         | plate                                                                                                                        |

## ... Data collection ...

|                                               |                                            |
|-----------------------------------------------|--------------------------------------------|
| Diffractometer                                | D8 Venture (Bruker-AXS)                    |
| Detector                                      | CMOS-PHOTON70                              |
| $\theta$ range for data collection            | 2.590 to 27.503°                           |
| $(\sin\theta/\lambda)_{\max}$ Å <sup>-1</sup> | 0.650                                      |
| $h_{\min}$ , $h_{\max}$                       | -16, 19                                    |
| $k_{\min}$ , $k_{\max}$                       | -16, 16                                    |
| $l_{\min}$ , $l_{\max}$                       | -35, 34                                    |
| Reflections collected / unique                | 27684 / 5857 [ $R_{\text{int}} = 0.0529$ ] |
| Reflections [ $I > 2\sigma$ ]                 | 5062                                       |
| Completeness to $\theta_{\max}$               | 0.997                                      |
| Absorption correction type                    | multi-scan                                 |
| Max. and min. transmission                    | 0.994, 0.852                               |

## ... Refinement ...

|                                           |                                                                                  |
|-------------------------------------------|----------------------------------------------------------------------------------|
| Refinement method                         | Full-matrix least-squares on $F^2$                                               |
| H-atom treatment                          | H-atom parameters treated by a mixture of independent and constrained refinement |
| Data / restraints / parameters            | 5857 / 2 / 355                                                                   |
| <sup>b</sup> Goodness-of-fit              | 1.275                                                                            |
| Shelxl weighting scheme parameters        | a = 0.0479, b = 6.3571                                                           |
| Final R indices [ $I > 2\sigma$ ]         | <sup>c</sup> R <sub>1</sub> = 0.0840, <sup>d</sup> wR <sub>2</sub> = 0.1704      |
| Final R indices [all data]                | <sup>c</sup> R <sub>1</sub> = 0.0959, <sup>d</sup> wR <sub>2</sub> = 0.1758      |
| $\Delta\rho_{\max}$ , $\Delta\rho_{\min}$ | 0.496, -0.341 e.Å <sup>-3</sup>                                                  |

$$^a R_{\text{int}} = \frac{\sum |F_o^2 - \langle F_o^2 \rangle|}{\sum F_o^2}$$

$$^b S = \left\{ \frac{\sum w(F_o^2 - F_c^2)^2}{n-p} \right\}^{1/2}$$

$$^c R_1 = \frac{\sum |F_o| - |F_c|}{\sum |F_o|}$$

$$^d wR_2 = \left\{ \frac{\sum w(F_o^2 - F_c^2)^2}{\sum w(F_o^2)^2} \right\}^{1/2}$$

$$w = 1./[\sigma(F_o^2) + (aP)^2 + bP] \text{ with } P = [2F_c^2 + \text{Max}(F_o^2, 0)]/3$$
